1 **Sex differences, cross-ancestry generalizability, and noise-smoking interactions**  
2 **in the polygenic architecture of hearing loss in adults**

3

4 Flavio De Angelis<sup>1,2</sup>, Oana A. Zeleznik<sup>3,4</sup>, Frank R. Wendt<sup>1,2</sup>, Gita A. Pathak<sup>1,2</sup>, Daniel S. Tylee<sup>1,2</sup>,  
5 Antonella De Lillo<sup>1,5</sup>, Dora Koller<sup>1,2,6</sup>, Brenda Cabrera-Mendoza<sup>1,2</sup>, Royce E Clifford<sup>7,8</sup>, Adam X.  
6 Maihofer<sup>8,9,10</sup>, Caroline M. Nievergelt<sup>8,9,10</sup>, Gary C. Curhan<sup>3,4</sup>, Sharon G. Curhan<sup>3,4</sup>, Renato  
7 Polimanti<sup>1,2\*</sup>

8

9 1. Department of Psychiatry, Yale University School of Medicine, West Haven, Connecticut, USA

10 2. Veteran Affairs Connecticut Healthcare System, West Haven, Connecticut, USA

11 3. Channing Division of Network Medicine, Department of Medicine, Brigham and Women's  
12 Hospital, Boston, Massachusetts, USA

13 4. Harvard Medical School, Boston, Massachusetts, USA

14 5. Department of Biology, University of Rome “Tor Vergata”, Rome, Italy

15 6. Department of Genetics, Microbiology and Statistics, Faculty of Biology, University of  
16 Barcelona, Spain

17 7. Division of Otolaryngology, Department of Surgery, University of California, San Diego, La  
18 Jolla, California, USA

19 8. Research Service, Veterans Affairs San Diego Healthcare System, San Diego, California, USA

20 9. Department of Psychiatry, University of California, San Diego, La Jolla, California, USA

21 10. Center of Excellence for Stress and Mental Health, Veterans Affairs San Diego Healthcare  
22 System, San Diego, California, USA.

23

24

25

26

27 \***Correspondence to:** Renato Polimanti, PhD. Yale University School of Medicine, Department of  
28 Psychiatry. VA CT 116A2, 950 Campbell Avenue, West Haven, CT 06516, USA. Phone: +1 (203)  
29 932-5711 x5745. Fax: +1 (203) 937-3897. E-mail: [renato.polimanti@yale.edu](mailto:renato.polimanti@yale.edu). ORCID: 0000-0003-  
30 0745-6046.

31

32 **Abstract**

33 We conducted a comprehensive genome-wide investigation of hearing loss (HL) in 748,668 adult  
34 participants of the UK Biobank, the Nurses' Health Studies (I and II), the Health Professionals  
35 Follow-up Study, and the Million Veteran Program. We identified 54 risk loci and characterized HL  
36 polygenic architecture, exploring sex differences, polygenic risk across ancestries, tissue-specific  
37 transcriptomic regulation, cause-effect relationships with genetically-correlated traits, and gene  
38 interactions with HL environmental risk factors. Our transcriptomic regulation analysis highlighted  
39 the potential role of the central nervous system in HL pathogenesis. This was supported by the  
40 multivariate interaction analysis that showed how genes involved in brain development interact with  
41 sex, noise pollution, and tobacco smoking in relation to their HL associations. Additionally, the  
42 genetically-informed causal inference analysis showed that HL is linked to many physical and  
43 mental health outcomes. These results provide many novel insights into the complex biology and  
44 epidemiology of HL in adults.

45

46

47

## 48 INTRODUCTION

49 Acquired hearing loss (HL) is the third most common chronic health condition<sup>1</sup> and the fourth  
50 leading cause of disability globally<sup>2</sup>. The World Health Organization (WHO) report of hearing  
51 projects that nearly 2.5 billion individuals will have some degree of HL by 2050<sup>3</sup>. HL is associated  
52 with several comorbid conditions<sup>4</sup>. For instance, HL-induced impaired communication ability  
53 particularly among older people can lead to social isolation with major health, psychosocial, and  
54 economic consequences, reducing the quality of life<sup>4,5</sup>. HL affects individuals of all ages, but its  
55 prevalence increases with age, reflecting the cumulative effect of environmental factors and genetic  
56 predisposition<sup>6</sup>.

57  
58 Heritability estimates for acquired HL range from 30% up to 70%<sup>7</sup>, highlighting that genetic  
59 variation is a key determinant for individual HL risk. More than 100 genes present mutations that  
60 result in congenital HL not associated with disorders in other organs or dysmorphic features (non-  
61 syndromic HL)<sup>8,9</sup>. Mutations causing congenital HL affect genes involved in cochlear function,  
62 specifically affecting the sensory and mechanosensory cells<sup>10-12</sup>. Beyond these Mendelian forms,  
63 acquired HL cases appear to be due to the additive effect of many common genetic variants with  
64 small individual effects. Large-scale genome-wide association studies (GWAS) conducted in  
65 population-based cohorts have identified more than 50 common risk variants and characterized the  
66 regulatory role of these loci in multiple cell and tissue types<sup>13-16</sup>. Although these studies have  
67 generated important insights into the genetic predisposition to HL, there are several aspects of the  
68 HL pathogenesis that are currently under-investigated by genetic studies. For instance, HL among  
69 older adults is more common, more severe, and with earlier onset in men than in women, even after  
70 adjusting for confounding factors such as higher occupational noise exposure in men<sup>17,18</sup>. However,  
71 the molecular pathways that underlie HL sex differences are unclear. Similarly, we have a limited  
72 understanding which are the biological processes interacting with HL environmental risk factors.  
73 Several studies showed that noise pollution and tobacco smoking are HL risk factors<sup>19-22</sup>, but to

74 date no large-scale studies investigated how genetic variation interacts with noise pollution and  
75 tobacco smoking in determining HL risk.

76

77 In the present study, we conducted an extensive genome-wide investigation across the UK Biobank  
78 (UKB; 251,233 women and 214,549 men)<sup>14</sup>, the Nurses' Health Studies (NHS I, 14,978 women;  
79 and NHS II, 12,533 women)<sup>23,24</sup> and the Health Professionals Follow-up Study (HPFS, 8,532  
80 men)<sup>25</sup>. The risk loci identified were replicated in a sample of 226,043 participants from the Million  
81 Veteran Program (MVP)<sup>26</sup>. Our findings provide a more comprehensive understanding of the  
82 genetic basis of HL sex differences, uncovering novel sex-specific risk loci, molecular processes,  
83 putative cause-effect relationships, and the interaction of genetic variation with sex, noise pollution,  
84 and smoking behaviors.

85

## 86 **METHODS**

### 87 **Cohorts and hearing-loss assessment**

88 We leveraged genome-wide information from 748,668 adult participants recruited by the UKB,  
89 NHS I, NHS II, HPFS, and MVP cohorts to investigate the polygenic architecture of HL.

90 UKB is a large population-based research resource, containing in-depth genetic and health  
91 information from over 500,000 UK participants 40-69 years at enrollment<sup>14</sup>. UKB HL-related  
92 phenotypes were defined by self-reported items derived from a touchscreen questionnaire and  
93 audiometric measurements assessed through the Speech Recognition Threshold (SRT) test. The  
94 self-reported items included the following binary traits: “*Do you have any difficulty with your*  
95 *hearing?*” (UKB Field ID: 2247); “*Do you find it difficult to follow a conversation if there is*  
96 *background noise (such as TV, radio, children playing)?*” (UKB Field ID: 2257); and “*Do you use*  
97 *a hearing aid most of the time?*” (UKB Field ID: 3393). UKB participants who indicated they were  
98 completely deaf (N=144) were excluded from the analysis to reduce the likelihood of including  
99 congenital forms of HL<sup>16</sup>. For ~12% of the UKB participants (59,807 for UKB Field ID 2247;

100 60,448; and 40,656 for UKB Field ID 3393), these items were assessed multiple times. Since age is  
101 a strong risk factor for acquired HL, we considered the most recent assessment when multiple  
102 assessments were available to improve the ability to detect the disease onset. In addition to  
103 considering these binary traits individually, we combined them in a four-category ordinal phenotype  
104 (Supplemental Table 1). For the SRT-derived audiometric measurements, we considered the UKB  
105 item “*the signal-to-noise ratio at which half of the presented speech can be understood correctly*”  
106 for both left and right ears (UKB Field ID: 20019 and 20021, respectively). Because of the much  
107 larger sample size, we included unrelated UKB participants of European descent in the primary  
108 discovery sample. The other ancestry groups available in UKB were used for single-variant and  
109 polygenic risk score (PRS) replication (see section Cross-ancestry Replication and Polygenic Risk  
110 Scoring).

111  
112 Additional genome-wide information was derived from NHS I, NHS II, and HPFS cohorts. The  
113 NHS I began in 1976 when 121,700 female registered nurses, aged 30–55 years, were enrolled by  
114 completing a baseline questionnaire about their health and lifestyle. In 1989, the NHS II was  
115 established and enrolled 116,429 younger female registered nurses, aged 25 to 42 years<sup>24</sup>. The  
116 HPFS began in 1986 and enrolled 51,529 male health professionals, aged 40 to 75 years. In each of  
117 the cohorts, detailed information on demographics, health, diet, and lifestyle factors was collected  
118 and updated every 2 years (every 4 years for diet). The follow-up rates in all 3 cohorts exceed 90%  
119 of eligible person-time<sup>27</sup>. Self-reported hearing status was determined based on participants’  
120 responses to biennial questionnaires. “*Hearing difficulty*” was defined as a participant report of a  
121 hearing problem that was mild, moderate, severe (non-hearing aid user), or severe (hearing aid  
122 user). Leveraging samples with genome-wide information, we investigated 14,978 unrelated female  
123 NHS I participants, 12,533 unrelated female NHS II participants, and 8,532 unrelated male HPFS  
124 participants, all of European descent. To maximize the sample size available, we meta-analyzed  
125 NHS I and II cohorts and referred to them hereafter as a single NHS sample.

126

127 The MVP is a biobank funded by the US Department of Veterans Affairs that to date enrolled more  
128 than 800,000 participants among active users of the Veterans Health Administration healthcare  
129 system<sup>26</sup>. In our analysis, we used genome-wide information regarding 85,743 cases and 140,300  
130 controls based on self-reported hearing-loss information. Information regarding HL assessment in  
131 MVP has been previously described<sup>28</sup>.

132

### 133 **Genome-wide data quality control and GWAS meta-analysis**

134 We used UKB imputed data<sup>29</sup>, filtering variants with imputation score  $< 0.8$ , minor allele  
135 frequency (MAF)  $< 0.01$ , Hardy-Weinberg Equilibrium p-values  $< 10^{-6}$ , and missingness  $> 0.1$ . The  
136 genetic data were employed to identify related individuals by estimating kinship coefficients for all  
137 pairs of samples. Accordingly, we removed individuals based on relatedness (one individual from  
138 pairs with kinship coefficient  $> 0.042$  was removed, with the preference to retain cases), forming a  
139 maximally unrelated subset<sup>29</sup>. In the NHS and HPFS cohorts, SNPs with imputation score  $< 0.8$  or  
140 minor allele frequency  $< 0.05$  were excluded. Quality checks included the exclusion of those  
141 participants with a poor genotype call rate ( $< 95\%$ ) and a check for relatedness. The SNPs with a  
142 poor call rate ( $< 95\%$ ), out of Hardy-Weinberg equilibrium ( $P < 10^{-5}$ ), with high duplicate  
143 discordance rates, or monomorphic were excluded. Genotyped data from each of the NHS and  
144 HPFS studies were imputed using the 1000 Genomes Project Phase 3 reference panel<sup>30,31</sup>. Details  
145 regarding genotyping and imputation of the MVP samples were described elsewhere<sup>32</sup>. Relatedness  
146 was estimated using KING<sup>33</sup>. For each pair of subjects with an estimated kinship coefficient  $> 0.088$   
147 (2nd degree or closer), one individual was removed, with the preference to retain cases. If  
148 individuals had the same diagnostic status, one individual was removed at random. HARE  
149 (harmonized ancestry and race/ethnicity) estimates<sup>34</sup> were used to select European ancestry  
150 individuals. GWAS were carried out in the UKB, NHS, and HPFS by logistic regression, using  
151 PLINK 2.0<sup>35</sup> and including age and the first 10 within-ancestry PCs as covariates. For the sex-

152 combined analyses, sex was also included as a covariate. The GWAS generated by the individual  
153 cohorts were meta-analyzed using the inverse variance-based method implemented in METAL<sup>36</sup>. In  
154 MVP, GWAS was performed using logistic regression of the hearing phenotype on imputed SNP  
155 dosages including covariates for 10 PCs, age, and sex, using PLINK 1.9 software<sup>35</sup>.

156

### 157 **SNP-based heritability and genetic correlation**

158 SNP-based heritability (SNP- $h^2$ ) and genetic correlation ( $r_g$ ) for all hearing traits were estimated  
159 using the Linkage Disequilibrium Score Regression (LDSC) method<sup>37</sup>. As recommended by the  
160 LDSC developers (details at <https://github.com/bulik/ldsc>), the analysis was conducted considering  
161 the HapMap 3 reference panel and pre-computed LD scores based on the 1000 Genomes Project  
162 reference data for individuals of European ancestry. SNP- $h^2$  and genetic correlations were evaluated  
163 among HL trait assessed in the UKB, NHS, HPFS, and their meta-analyses. Since functional  
164 categories of the genome contribute disproportionately to the heritability of complex diseases<sup>38</sup>,  
165 SNP- $h^2$  partitioning was conducted with LDSC using 95 baseline genomic annotations<sup>39</sup> such as  
166 allele frequency distributions, conserved genomic regions, regulatory elements, and annotations for  
167 genic, loss-of-function (LoF) intolerant, positively and negatively selected regions<sup>40</sup>. We also  
168 conducted a UKB phenome-wide genetic correlation analysis of HL, testing 7,153 phenotypes for  
169 the sex-combined investigation, 3,287 phenotypes for the female-specific investigation, and 3,144  
170 phenotypes for the male-specific investigation. The genome-wide association statistics for the sex-  
171 combined analysis were derived from the Pan-UKB data release (available at  
172 <https://pan.ukbb.broadinstitute.org/downloads>). The sex-specific genome-wide association statistics  
173 were derived from a previous UKB analysis (available at <http://www.nealelab.is/uk-biobank>).

174

### 175 **Latent causal variable analysis**

176 To evaluate whether the genetic correlations of HL are due to cause-effect relationships, we used  
177 the latent causal variable (LCV) method to conduct a genetically-informed causal inference

178 analysis<sup>41</sup>. As recommended, only SNPs with MAF > 5% were considered, and the major  
179 histocompatibility region was removed. Considering traits that reached at least a nominally  
180 significant genetic correlation ( $p < 0.05$ ) with HL, we tested 879 traits in the sex-combined analysis,  
181 323 traits in the female-specific analysis, and 332 traits in the male-specific analysis. For each  
182 comparison, the genetic causality proportion (gcp) can range from zero (no partial genetic causality)  
183 to one (full genetic causality).

184

### 185 **Variant prioritization, fine-mapping, and multi-tissue transcriptome-wide association study**

186 To identify the causal loci underlying the statistical association observed, we functionally annotated  
187 GWAS findings and prioritized the most likely causal SNPs and genes using pre-calculated LD  
188 structure based on 1000 Genomes Project EUR reference populations<sup>42</sup>. The risk loci identified in  
189 the sex-combined and sex-specific meta-analyses were classified considering the following  
190 parameters derived from Functional Mapping and Annotation of Genome-Wide Association Studies  
191 (FUMA)<sup>42</sup>:  $\text{leadP} = 5 \times 10^{-8}$ ;  $\text{gwasP} = 0.05$ ;  $R^2 = 0.1$ ;  $\text{refpanel} = 1000$  Genomes Project Phase3 EUR  
192 reference populations;  $\text{MAF} = 0.01$ ;  $\text{refSNPs} = 1$ ;  $\text{mergeDist} = 250$ . Positional mapping was  
193 performed considering  $\text{MapWindowSize} = 10$  and the minimum Combined Annotation Dependent  
194 Depletion (CADD)<sup>43</sup> score for SNP filtering was set to 0. Gene-based analysis and gene-set analysis  
195 were performed with Multi-marker Analysis of GenoMic Annotation (MAGMA)<sup>44</sup> integrated into  
196 FUMA. Tissue enrichment analysis was performed using Genotype-Tissue Expression (GTEx)  
197 project v8 data<sup>45</sup>.

198 We fine-mapped the association statistics for a 3MB region around the lead SNP of the genomic  
199 risk locus identified by FUMA ( $r^2 = 0.1$ ;  $\text{window} = 250\text{bp}$ ). Each region for the respective  
200 association was fine-mapped to determine 95% credible set using  $\text{susieR}$ <sup>46</sup> with at most 10 causal  
201 variants (default). The credible set reports variants most likely to be causal based on the marginal  
202 posterior inclusion probability (PIP) ranging from 0 to 1, with values closer to 1 to be most causal.



203 To further explore transcriptomic regulation in the context of HL, we performed a multi-tissue  
204 TWAS (transcriptome-wide association study), using the S-MultiXcan approach to combine  
205 information across 49 GTEx tissues adjusting for tissue–tissue correlation<sup>47</sup>.

206

### 207 **Cross-ancestry replication and polygenic risk scoring**

208 We used data from the Pan-UKB data release (available at  
209 <https://pan.ukbb.broadinstitute.org/downloads>) to conduct cross-ancestry replication and PRS  
210 analyses. Specifically, we derived PRS of HL associations from EUR ancestry (base dataset) and  
211 tested in UKB participants of African (AFR N=6,636), admixed American (AMR N=980),  
212 Centra/South Asian (CSA N=8,876), East Asian (EAS N=2,709), and Middle Eastern (MID  
213 N=1,599) ancestries (target datasets). PRS analysis based on HL meta-analyzed and sex-stratified  
214 GWAS was computed using PRSice v. 2.3.1.c<sup>48</sup>, using the clumping-thresholding method to  
215 maximize the predictive ability of the derived polygenic scores<sup>49</sup>. Using 1000 Genomes Project  
216 EUR populations as reference panel, SNPs were clumped based on 250kb windows, based on  
217 clump-r2 threshold=0.1 and clump-p threshold=1, respectively. The step size of the threshold was  
218 set to  $5 \times 10^{-5}$ , and the range of p-value thresholds was from  $5 \times 10^{-8}$  to  $p=1$  using an additive model  
219 for regression at each threshold.

220

### 221 **Multivariate gene-by-environment genome-wide interaction study**

222 A multivariate gene-by-environment genome-wide interaction study (GEWIS) was performed using  
223 StructLMM<sup>50</sup>, a linear mixed-model approach to efficiently detect interactions between loci and  
224 multiple potentially correlated environments. Since StructLMM assumes a quantitative trait, the  
225 GEWIS was conducted considering the four-category ordinal trait described above (Supplemental  
226 Table 1). The multivariate GEWIS was performed considering a total of 14 environments, including  
227 sex, smoking behaviors and exposures, and different types of noise pollution exposure  
228 (Supplemental Table 2). Marginal log-likelihoods (log (Bayes factor -BF)) between the full model

229 and the reduced model with environments removed were used to identify the most relevant  
230 environments for the detected locus interaction effects. A pathway enrichment analysis was  
231 conducted considering loci with nominally significant multivariate gene-environment interaction.  
232 These variants were clumped using R `ld_clump` function (ieugwasr R package) using `clump_kb =`  
233 `10,000`, `clump_r2 = 0.001`, and `clump_p = 0.05`. The resulting variants showing  $BF > 1$  were mapped  
234 to genes through Ensembl platform<sup>51</sup>. A Gene Ontology (GO) enrichment analysis was performed  
235 using the Database for Annotation, Visualization and Integrated Discovery (DAVID)<sup>52</sup> and GO  
236 terms surviving false discovery rate (FDR) multiple testing correction ( $q < 0.05$ ) were retained as  
237 significant.

238

## 239 **RESULTS**

### 240 **SNP-based heritability and genetic correlation among hearing-loss traits**

241 We investigated the SNP- $h^2$  across multiple HL traits. In the UKB, these included phenotypes derived  
242 from the touchscreen questionnaire and an automated hearing assessment (i.e., SRT test). For the  
243 questionnaire-derived HL traits, the SNP- $h^2$  ranged from  $0.017 \pm 0.002$  for “*Hearing aid use*” to  
244  $0.050 \pm 0.002$  for “*Hearing difficulties with background noise*”. The genome-wide statistics of these HL  
245 traits were characterized by inflation due to polygenicity (genomic-control  $\lambda > 1.09$ ) and not  
246 because of possible confounders (LDSC intercept  $< 1.03$ ; Supplemental Table 3). With respect to STR-  
247 derived traits, the SNP- $h^2$  was lower  $< 1\%$  with only right-ear assessment with an estimate  
248 statistically different from zero (SRT-right SNP- $h^2 = 0.009 \pm 0.002$ ; Table 1). The limited  
249 informativeness of the SRT test in genetic studies is in line with previous findings<sup>16,53</sup>. Accordingly,  
250 the SRT-derived traits were excluded for further evaluations.

251

252

253

254

255 The genetic correlations among the questionnaire-derived HL traits in UKB ranged from  
256  $rg=0.830\pm 0.013$  between “*Hearing difficulties*” and “*Hearing difficulties with background noise*”,  
257 to  $rg=0.393\pm 0.039$  between “*Hearing difficulties with background noise*” and “*Hearing aid use*”  
258 (Figure 1; Supplemental Table 4).

259  
260 The ordinal phenotype derived from combining the three questionnaire-derived HL traits in UKB  
261 (Supplemental Table 1; hereafter abbreviated as HL-ORD) showed a high genetic correlation with  
262 each of the binary phenotypes, ranging from  $rg=0.927\pm 0.015$  with “*Hearing difficulties*” to  
263  $rg=0.830\pm 0.020$  with “*Hearing aid use*”.

264  
265 To further investigate the differences across the questionnaire-derived HL traits, we conducted a  
266 sex-stratified analysis and tested the genetic correlation among whole-sample and sex-stratified  
267 analyses in UKB and also with respect to HL assessed in NHS (female participants only; SNP-  
268  $h^2=0.077\pm 0.020$ ) and HPFS (male participants only; SNP- $h^2=0.161\pm 0.053$ ). Considering each of  
269 the HL traits tested, no difference was observed between sexes in the SNP- $h^2$  estimates (Table 1).  
270 Among the UKB questionnaire-derived HL traits, “*Hearing difficulties with background noise*”  
271 showed the highest  $rg$  between males and females ( $rg=0.882\pm 0.035$ ), while the lowest  $rg$  between  
272 sexes was observed for the HL-ORD trait ( $rg=0.782\pm 0.050$ ).

273  
274 Considering the HPFS HL outcome and male-specific UKB analyses, the highest genetic  
275 correlation was observed for “*Hearing difficulty*” ( $rg=0.633\pm 0.136$ ). The same trait was the one  
276 with the highest genetic correlation with the NHS HL outcome among the UKB female-specific  
277 analyses ( $rg=0.737\pm 0.115$ ). Based on the genetic correlations among UKB, HPFS, and NHS, the  
278 UKB “*Hearing difficulties*” was defined as the primary UKB phenotype and the loci identified with  
279 respect to this trait were tested for single-variant and PRS replication using the NHS and HPFS  
280 datasets. Additionally, to maximize the discovery of our analyses, we also meta-analyzed UKB,

281 NHS, and HPFS cohorts (278,744 female participants from UKB and NHS and 223,081 male  
282 participants from UKB and HPFS).

283

### 284 **Genome-wide association analyses**

285 In UKB sex-combined analysis, we identified 46 LD-independent genome-wide significant (GWS)  
286 loci ( $P < 5 \times 10^{-8}$ ) associated with hearing difficulties (Supplemental Table 5). In the sex-stratified  
287 analyses, we identified 14 and 19 LD-independent GWS loci in males and females, respectively  
288 (Supplemental Tables 6 and 7). In a few instances, the top-index variant identified in the sex-  
289 stratified analyses was LD-independent from the ones mapped in the GWAS loci observed in the  
290 entire cohorts. Additionally, we identified six variants with statistical differences in the sex-specific  
291 effects of the HL-associated variants (Supplemental Tables 6 and 7; rs2876317 in *PDE7B*;  
292 rs9784468 in *SORBS2*, rs1808828 in *ABLIM3*, rs9677089 in *SPTBN1*, rs12515096 in *ARHGEF28*,  
293 and rs35624969 in *TBL2*).

294 Beyond single-variant associations, the PRS derived from UKB were significantly associated with  
295 hearing difficulties in NHS and HPFS considering sex-combined and sex-stratified analyses (sex-  
296 combined PRS on NHS+HPFS:  $R^2=0.05\%$ ,  $p=6.59 \times 10^{-6}$ ; female-specific PRS on NHS:  $R^2=0.47\%$ ,  
297  $p=1.77 \times 10^{-30}$ , male-specific PRS on HPFS:  $R^2=0.5\%$ ,  $p=2.84 \times 10^{-11}$ ).

298

299 The GWAS meta-analysis of UKB, NHS, and HPFS (N=501,825) provided a higher statistical  
300 power, identifying 54 LD-independent loci significantly associated with hearing difficulties (Table  
301 2).

302

303 In the sex-stratified investigation, we gained one additional locus in the male-specific GWAS meta-  
304 analysis (15 LD-independent GWS loci) and five additional loci in the female-specific GWAS  
305 meta-analysis (24 LD-independent GWS loci). Similar to the UKB-only GWAS, few index variants  
306 identified in the sex-specific GWAS meta-analysis were LD-independent of the loci identified in

307 the overall GWAS meta-analysis and we identified statistical differences between sexes in their  
308 effect size for three variants (Supplemental Table 8; rs13399656 mapped to *SPTBN1*, rs1808828 in  
309 *ABLIM3*, and rs11738813 in *ARHGEF28*).

310 Considering the 54 loci reaching genome-wide significance in the sex-combined meta-analysis, we  
311 tested whether the effects detected were replicated in an independent sample, 226,043 MVP  
312 participants of European descent. We observed that 34 loci were at least nominally replicated in the  
313 MVP cohort (Table 2;  $p < 0.05$ ). Considering concordance between discovery and replication  
314 cohorts, 49 loci showed consistent effect direction. The probability of observing concordant  
315 directions of 49 out of the 54 loci tested by chance is  $5.9 \times 10^{-6}$ . Leveraging our discovery GWAS  
316 meta-analysis as a training dataset, we conducted a PRS analysis in the MVP cohort that showed  
317 highly significant prediction across all variant-inclusion thresholds tested ( $p < 1.20 \times 10^{-103}$ ;  
318 Supplemental Table 9).

319

320 To assess the cross-ancestry generalizability of the loci identified by the GWAS meta-analysis, we  
321 conducted a replication analysis of the single-variant associations in the UKB participants of non-  
322 European descent (AFR N=6,636; AMR N=980; CSA N=8,876; EAS N=2,709; MID N=1,599).

323 Considering a nominal significance threshold, we replicated ( $p < 0.05$ ) the associations of four  
324 variants (rs6675438, rs61863078, rs2273654, and rs61734651) in AFR, five variants (rs666720,  
325 rs1220628, rs271143, rs9493627, rs146229052) in AMR, ten variants were replicated in CSA  
326 (rs666720, rs6662164, rs148512269, rs6869243, rs6871548, rs296430, rs2296506, rs766262445,  
327 rs72930998, and rs1005473), and two variants in EAS (rs11238325, and rs34993346)  
328 (Supplemental Table 10). The limited number of single-loci replication is due to the dramatic  
329 difference in sample size between the EUR discovery cohort (N=501,825) and the non-EUR  
330 replication cohorts (total N=20,800). However, we observed a significant cross-ancestry  
331 transferability in the HL PRS considering the GWAS meta-analysis and UKB-only GWAS as  
332 training datasets. Specifically, we observed an increased statistical power of the PRS derived from

333 the GWAS meta-analysis (UKB-NHS-HPFS PRS: AFR  $R^2=4.73\%$ ,  $p=4.65\times 10^{-68}$ ; AMR  $R^2=1.96\%$ ,  
334  $p=1.23\times 10^{-5}$ ; CSA  $R^2=3.5\%$ ,  $p=6.26\times 10^{-66}$ ; EAS  $R^2=2.45\%$ ,  $p=1.94\times 10^{-15}$ ) when compared to the  
335 one derived from the UKB-only GWAS (UKB-only PRS: AFR  $R^2=0.14\%$ ,  $p=0.001$ ; AMR  
336  $R^2=0.54\%$ ,  $p=0.0140$ ; CSA  $R^2=0.13\%$ ,  $p=6.01\times 10^{-4}$ ; EAS  $R^2=0.08$ ,  $p=0.076$ ). Due to the limited  
337 sample size available, we did not conduct a sex-stratified cross-ancestry replication analysis with  
338 respect to single-variant and PRS associations.

339  
340 Because of the higher statistical power, the following sections describe the *in-silico* analyses  
341 conducted on the basis of the GWAS meta-analyses of UKB (field ID 2247 “*Hearing difficulties*”),  
342 NHS (“*Hearing problems*”), and HPFS (“*Hearing problems*”).

#### 343 344 **Variant prioritization, fine-mapping, and multi-tissue transcriptome-wide association study**

345 To translate genetic associations into information regarding potential causal genes associated with  
346 hearing difficulties, we integrated different approaches ranging from positional mapping to  
347 imputation of genetically-regulated transcriptomic variation.

348  
349 First, we performed a fine-mapping analysis for each GWS locus. Based on the PIP of the 4,382  
350 SNP associations reaching GWS in the sex-combined GWAS meta-analysis, we identified 218  
351 variants that are most likely to be causal (PIP > 30%; Supplemental Figure 1). Considering a CADD  
352 score threshold of 10 (top 1% of pathogenic variants across the human genome), we further  
353 prioritized 24 variants that mapped to 18 unique genes (Supplemental Table 11). Some of them  
354 (e.g., *ARID5B*, *CTBP2*, and *FTO*) were previously identified as causal loci of Mendelian forms of  
355 deafness and HL<sup>8,16</sup>. Applying the same mapping strategy to the sex-stratified GWS loci, we  
356 identified 84 and 46 variants in the credible set for female- and male-specific analyses, respectively  
357 (Supplemental Figures 2 and 3). These included six female-specific and two male-specific

358 pathogenic variants (CADD score>10). The sex-stratified mapping genes mostly overlapped with  
359 the ones identified in the sex-combined GWAS meta-analysis.

360

361 In addition to the positional mapping approach, we also implemented an independent method based  
362 on the genetic regulation of transcriptomic variation. Combining tissue-specific information  
363 regarding expression quantitative trait loci (eQTL), we conducted a multi-tissue TWAS using the S-  
364 MultiXcan approach<sup>47</sup>. In the sex-combined meta-analysis, we identified 107 transcriptome-wide  
365 significant (TWS) genes (multi-tissue  $p < 2.24 \times 10^{-6}$ ; Figure 2; Supplemental Table 12).

366

367 Considering top tissue-specific effect underlying the cross-tissue associations, we observed that five  
368 of the top-10 strongest associations were brain-related: putamen basal ganglia (*CRIP3*  $p = 1.19 \times 10^{-23}$ ),  
369 spinal cord c-1 (*PIK3R3*  $p = 1.32 \times 10^{-19}$ ), pituitary gland (*TMEM69*  $p = 2.14 \times 10^{-18}$ ), caudate basal  
370 ganglia (*IPP*  $p = 3.04 \times 10^{-18}$ ), cerebellar hemisphere (*SLC22A7*  $p = 3.56 \times 10^{-18}$ ), and cerebellum  
371 (*MAST2*  $p = 3.17 \times 10^{-17}$ ). The strongest non-brain related TWS associations included tibial artery  
372 (*ARHGEF28*  $p = 3.29 \times 10^{-17}$ ), cultured fibroblasts (*ACAN*  $p = 5.17 \times 10^{-17}$ ), left ventricle (*DLK2*  
373  $p = 1.03 \times 10^{-16}$ ), and tibial nerve (*NASP*  $p = 1.42 \times 10^{-16}$ ). In the sex-stratified meta-analysis, we  
374 identified 55 and 26 multi-tissue TWS associations in females and males, respectively  
375 (Supplemental Table 13). The sex-specific loci mostly overlapped with those identified in the sex-  
376 combined TWAS: i) 14 genes were TWS in three analyses; ii) 45 out of 55 female-specific TWS  
377 genes were also significant in the sex-combined TWAS; iii) 23 out of the 26 male-specific TWS  
378 genes were also significant in the sex-combined TWAS. However, for tissue-specific effects, we  
379 observed that the top genes were not related to brain transcriptomic regulation (top female-specific  
380 association: liver-*CRIP3*  $p = 1.59 \times 10^{-18}$ ; top male-specific association: spleen-*PHLDB1*  $p = 1.59 \times 10^{-11}$ ).  
381 Additionally, among female-specific associations, we identified associations related to female  
382 organs: mammary gland (*ABCC10*  $p = 6.16 \times 10^{-15}$ ) and vagina (*BAIAP2L2*  $p = 7.45 \times 10^{-13}$ ).

383



## 384 **Enrichment for regulatory elements and biological pathways**

385 To dissect further its polygenic architecture, we partitioned HL SNP- $h^2$  with respect to regulatory  
386 elements to uncover enrichment of relevant biological annotations and processes. We observed that  
387 several annotations related to the regulatory function of the human genome are more likely to be  
388 involved in HL predisposition than that expected by chance (Supplemental Table 14). These  
389 included evolutionary-conserved regions (e.g., “*genomic evolutionary rate profiling scores*”  
390  $p=1.11\times 10^{-16}$ ) and “elements involved in epigenetic and transcriptomic regulation (e.g., “*CpG*  
391 *dinucleotide content*”  $p=1.53\times 10^{-10}$ ; “*super-enhancer regions*”  $p=1.54\times 10^{-7}$ ). In a complementary  
392 approach, we performed gene set enrichment analysis of HL-associated genes (based on  
393 positionally mapping). Two biological pathways were observed to be statistically overrepresented:  
394 “*response to trabectedin*” ( $p=1.58\times 10^{-8}$ ) and “*sensory perception of mechanical stimulus*”  
395 ( $p=1.69\times 10^{-7}$ ). With respect to both analyses, we did not identify statistical differences in the  
396 enrichments calculated from the sex-specific genetic associations.

397

## 398 **Phenome-wide genetic correlation and latent causal variable analysis of hearing loss**

399 To investigate the genetic overlap of HL with other traits and diseases, we assessed phenome-wide  
400 genetic correlation considering 5,337 phenotypes for the sex-combined analysis, 2,353 for the  
401 female-specific analysis, and 2,249 for the male-specific analysis. Considering a Bonferroni  
402 correction accounting for the number of phenotypes tested in sex-combined, female, and male  
403 analyses, we identified 309, 79, and 109 significant genetic correlations, respectively (Figure 3;  
404 Supplemental Table 15).

405

406 With respect to the sex-combined GWAS meta-analysis, the strongest genetic correlation was  
407 “*Tinnitus*” ( $r_g=0.52$ ,  $p=2.44\times 10^{-55}$ ). Other strong positive genetic correlations included “*Long-*  
408 *standing illness, disability or infirmity*” ( $r_g=0.36$ ,  $p=7.12\times 10^{-41}$ ); and “*Frequency of tiredness /*  
409 *lethargy in last 2 weeks*” ( $r_g=0.33$ ,  $p=3.85\times 10^{-37}$ ). Among negative HL genetic correlations, we



410 observed “*Leisure/social activities*” ( $rg=-0.19$ ,  $P=3.30\times 10^{-10}$ ) and “*Belief that own life is*  
411 *meaningful*” ( $rg=-0.18$ ,  $p=3.38\times 10^{-6}$ ). Although many of the sex-specific genetic correlations  
412 overlapped with those shared with sex-combined analysis, we also identified five traits with  
413 statistically significant sex differences in their genetic correlation with HL. Four of them were  
414 related to educational attainment with the strongest one observed for “*Qualification: College or*  
415 *University degree*” (female  $rg=0.11$ ,  $P=2.52\times 10^{-5}$ , male  $rg=-0.12$ ,  $P=1.15\times 10^{-5}$ ;  $p_{sex-}$   
416  $difference=1.16\times 10^{-9}$ ). The fifth genetic correlation was related to “*Time spend outdoors in summer*”  
417 (female  $rg=-0.16$ ,  $P=2.73\times 10^{-5}$ , male  $rg=0.06$ ,  $P=0.08$ ;  $p_{sex-difference}=1.95\times 10^{-5}$ ).

418  
419 To distinguish genetic correlations due to shared genetic mechanisms from those due to possible  
420 cause-effect relationships, we conducted an LCV analysis, identifying 22 significant putative causal  
421 effects ( $p<5.68\times 10^{-5}$ ; Figure 4, Supplemental Table 16).

422  
423 The traits with putative causal effect on HL included psychiatric traits (e.g., “*Ever had period of*  
424 *mania / excitability*”  $gcp=0.508$ ,  $p=3.59\times 10^{-23}$ ), neurological disease (e.g., “*Migraine*”  $gcp=0.891$ ,  
425  $p=7.1\times 10^{-21}$ ), gastrointestinal outcomes (e.g., “*ICD-10 K63 Other diseases of intestine*”  $gcp=0.884$ ,  
426  $p=2.25\times 10^{-11}$ ), urogenital outcomes (e.g., “*ICD-10 N32 Other disorders of bladder*”  $gcp=0.755$ ,  
427  $p=7.83\times 10^{-15}$ ), medication use (e.g., “*Ranitidine*”  $gcp=0.691$ ,  $p=1.38\times 10^{-12}$ ), cardiovascular  
428 diseases (“*Stroke family history*”  $gcp=0.825$ ,  $p=6.67\times 10^{-11}$ ), immunological conditions  
429 (“*Eczema/dermatitis*”  $gcp=0.327$ ,  $p=3.82\times 10^{-5}$ ), and workplace environment (“*Workplace very*  
430 *dusty*”  $gcp=0.733$ ,  $p=2.04\times 10^{-10}$ ). We also identified genetic evidence that support a putative causal  
431 role on HL for four outcomes: “*Tinnitus*” ( $gcp=0.705$ ,  $p=4.85\times 10^{-8}$ ); “*I was easily distracted*”  
432 ( $gcp=0.069$ ,  $p=8.44\times 10^{-15}$ ), and “*Felt distant from other people in past month*” ( $gcp=0.331$ ,  
433  $p=6.52\times 10^{-6}$ ). Although it did not survive multiple testing correction, the strongest sex difference  
434 was observed with respect to “*Not having bipolar or depression disorder*” where there was a

435 negative genetic causal effect on HL in females but not in males (females  $gcp = -0.73$ ,  $p = 0.005$ ;  
436 males  $gcp = -0.28$ ,  $p = 0.147$ ;  $p_{\text{sex-difference}} = 7.69 \times 10^{-4}$ ).

437

### 438 **Multivariate gene-by-environment genome-wide interaction analysis**

439 To investigate the role of gene-environment interactions in the predisposition to HL, we conducted  
440 a multivariate GEWIS. Because of the assumptions of the linear mixed model approach used<sup>50</sup>, we  
441 conducted this analysis with respect to the HL-ORD trait (UKB N=300,818). We tested 14  
442 environmental factors simultaneously (Supplemental Table 2). In addition to sex, these include  
443 environments related to noise pollution (N=5) and tobacco smoking habits (N=8). Although no  
444 variant survived genome-wide testing correction, we identified 1,278 LD-independent nominally  
445 significant multivariate interactions (Supplemental Table 17). To identify environment-specific  
446 effects underlying the multivariate interactions of each of these variants, we considered  $BF > 1$   
447 following StructLMM recommendations<sup>50</sup>. We then conducted a GO enrichment analysis stratifying  
448 the LD-independent loci with nominally significant multivariate interactions based on the  
449 environment where they showed a  $BF > 1$ . Considering FDR multiple testing correction at 5%, we  
450 identified 204 significant enrichments with respect to 57 unique GO terms. Most GO enrichments  
451 were shared across loci showing interaction effects with specific sex, noise, and smoking  
452 environmental factors ( $BF > 1$ ). Specifically, loci with environment-specific interactions related to  
453 sex, noise, and smoking showed 17 shared GO enrichments with respect to (e.g., GO:0007399  
454 Nervous system development: “Sex”  $p = 2.0 \times 10^{-6}$ ; “Average evening sound level of noise pollution”  
455  $p = 1.3 \times 10^{-6}$ ; “Maternal smoking around birth”  $p = 3.6 \times 10^{-7}$ ). Similarly, loci interacting only with  
456 noise and smoking environment (but not sex) shared 17 GO enrichments (e.g., GO:0030182 Neuron  
457 differentiation: “Noisy workplace”  $p = 4.4 \times 10^{-5}$ ; “Ever smoked”  $p = 4.4 \times 10^{-6}$ ) and two GO  
458 enrichments related to loci with environment-specific interactions related to sex and smoking (e.g.,  
459 GO:0050767 Regulation of neurogenesis: “Sex”  $p = 7.5 \times 10^{-5}$ ; “Maternal smoking around birth”  
460  $p = 4.6 \times 10^{-5}$ ). We also identified enrichments related to loci interacting only with a specific

461 environment category: seven GO terms related to sex interactions (e.g., GO:0030857 Negative  
462 regulation of cell differentiation: “*Sex*”  $p=8.2\times 10^{-5}$ ), 10 GO terms related to noise-pollution  
463 interactions (e.g., GO:0050885 Neuromuscular process controlling balance: “*Noisy workplace*”  
464  $p=3.7\times 10^{-4}$ ), and three GO terms related to smoking interactions (e.g., GO:0016101 Diterpenoid  
465 metabolic process: “*Smoking/smokers in household*”  $p=2.1\times 10^{-4}$ ).

466

467

## 468 **DISCUSSION**

469 We conducted a large-scale investigation integrating information from genome-wide associations  
470 with tissue-specific transcriptomic variation and a causal inference analysis to translate genetic  
471 findings into insights regarding HL biology and epidemiology. Additionally, we expanded the focus  
472 of our investigation to differences between sexes and ancestries and to the interplay of genetic  
473 variation with noise pollution and tobacco smoking, two well-known HL risk factors.

474

475 Initially, we compared the SNP- $h^2$  of different HL definitions available from UKB. These included  
476 three questionnaire-derived self-reported hearing traits and one trait derived from audiometric  
477 measures. Consistent with previous studies<sup>16,53</sup>, we observed that SRT-derived assessment had a  
478 very low SNP- $h^2$  (<1%) that did not permit us to investigate further this HL outcome. Conversely,  
479 self-reported HL outcomes showed significant SNP- $h^2$  that was informative to investigate their  
480 polygenic architecture. We observed a high genetic correlation ( $r_g>0.7$ ) between them with the only  
481 exception being “*Hearing difficulty with background noise*” and “*Hearing aid use*” where the  
482 genetic correlation was much lower ( $r_g<0.4$ ). This may be because the proportion of individuals  
483 who seek hearing aids for their hearing loss is very low, even in the UK where hearing aids are fully  
484 covered by the National Health Service. Considering the HL outcome available in NHS and HPFS  
485 cohorts, we observed the highest correlation with the UKB outcome “*Hearing difficulties*”.

486 Accordingly, these traits were used for the GWAS meta-analysis and the subsequent *in silico*

487 investigations. These self-reported traits are considered relatively reliable instruments to investigate  
488 “real world” hearing impairment, although potentially influenced by psycho-social factors<sup>16</sup>.  
489 In the sex-combined GWAS meta-analysis including 501,825 individuals, we identified 54 LD-  
490 independent genome-wide significant associations, 14 of which are novel with respect to those  
491 identified by previous HL GWAS<sup>8,13,16,54</sup>. In the UKB-NHS-HPFS meta-analysis, three variants  
492 showed statistical differences between sexes in their effect size. Specifically, rs13399656 in  
493 *SPTBN1* was the top findings in the sex-difference associations. This gene was previously  
494 recognized as a target for  $\beta$ -estradiol as the top upstream regulator<sup>55</sup> and was already associated  
495 with altered expression in estrogen-responsive tissues in HL<sup>8</sup>. Similarly, rs1808828 mapped to  
496 *ABLIM3* and rs11738813 in *ARHGEF28* were identified as intronic variants mapped in genes  
497 involved in estrogen signaling pathway<sup>56,57</sup>. These sex-specific associations changes in significant  
498 loci involved in hormonal regulating pathways may reflect the potential role of estrogen on hearing  
499 functions.

500  
501 Although this primary analysis was conducted in individuals of European descent, we replicated  
502 several associations in an independent sample of 20,800 UKB participants of AFR, AMR, CSA,  
503 EAS, and MID descent. Additionally, we demonstrated that HL polygenic risk is partially shared  
504 across ancestry groups. However, consistent with previous studies of other health outcomes<sup>58-60</sup>,  
505 there are large differences in the predictive power due to the genetic diversity across human  
506 populations. Additionally, in some cases the HL variance explained by the cross-ancestry PRS  
507 association is larger than the one observed in the same-ancestry PRS association. This can be  
508 explained by two factors: i) the cross-ancestry results are based on the UKB cohort where the  
509 participants share the same HL assessment and sample characteristics; ii) the different LD structures  
510 of the ancestries investigated may have inflated the results observed.

511

512 The fine-mapping of the risk loci led to identifying putatively pathogenic variants (CADD  
513 score>10) mapped to genes previously demonstrated to be involved in HL pathogenesis.  
514 Specifically, we identified the exonic variant rs13147559 mapping in *CLRN2* as the strongest  
515 finding (CADD=22.5). This locus has been identified as causative for non-syndromic HL<sup>61</sup> and may  
516 have a role in hair cell mechano-transduction<sup>62</sup>. Two exonic mutations in *NOL12:TRIOBP* were  
517 also identified as potentially deleterious (rs5756795 and rs7284476). *TRIOBP* alterations are related  
518 to both congenital deafness<sup>63</sup> or Mendelian HL<sup>15</sup>. Mutations mapped to this gene have been  
519 thoroughly analyzed, especially in patients with a post-lingual HL (i.e., HL occurring after the  
520 development of normal speech)<sup>64,65</sup>. Non-coding regulatory variants were also identified in HL-  
521 related genes such as *DLG4*, *ARID5B*, and *CTBP2*. In mice, elevated *Arid5b* in the aged cochlea is  
522 known to be critical for the etiologies of sensorineural HL, such as age-related HL, noise- and  
523 ototoxic drug-induced HL<sup>66</sup>. Conversely, *DLG4* was previously identified as significantly related to  
524 hearing due to its association with the hippocampal glutamatergic synapse pathways<sup>67</sup>. The  
525 deleterious variant mapping at *CTBP2* also supports the role of the central nervous system in HL  
526 pathogenesis. Indeed, *CtBP2* is a marker for cochlear ribbon synapses, and deleterious variants  
527 (such as rs183893500, CADD=15.24) could influence vulnerability to cochlear synaptopathy (i.e.,  
528 loss of nerve connections between the sensory cells and the central nervous system) in acquired  
529 sensorineural HL<sup>68,69</sup>.

530  
531 Our TWAS further highlighted that HL genetic basis is partially linked to brain transcriptomic  
532 regulation. We identified that several genes previously implicated in HL pathogenesis because of  
533 their potential involvement in the peripheral structures of the auditory system, which also showed  
534 predicted expression differences in various brain regions. For example, while *CRIP3* has broad  
535 expression in inner and outer hair cells<sup>8</sup>, we observed that transcriptomic changes of this gene in the  
536 putamen basal ganglia were associated with HL. Similarly, other genes that may be implicated in  
537 HL pathogenesis through both peripheral and central mechanisms include *IPP* (previously reported

538 as highly expressed in human cochlear, cochlear hair cells, and spiral ganglion cells in mice<sup>54</sup>),  
539 *PIK3R3* (previously identified as specific to cell types in the cochlea<sup>70</sup>), *MAST2* (showing  
540 differential expression in the development of the inner ear<sup>54</sup>), and *SLC22A6* (identified as related to  
541 cochlear impairment<sup>71</sup>). Taken together, these results suggest that auditory dysfunction is not  
542 restricted to peripheral auditory structures, but subcortical neuroplastic changes involving the area  
543 receiving ascending signals from inferior brainstem nuclei could also be involved<sup>72</sup>. Additionally,  
544 several TWAS associations were related to the transcriptomic regulation in the cerebellum in line  
545 with the involvement of this brain region in auditory pathways<sup>73</sup>.

546  
547 The sex-stratified TWAS showed several additional associations related to peripheral tissues. In  
548 particular, the female-specific TWAS identified as top findings transcriptomic changes of genes in  
549 breast mammary tissue (*ABCC10*) and vagina (*BAIAP2L2*). These associations in hormonally  
550 regulated tissues may reflect a potential role of estrogen in hearing function<sup>74</sup>. Indeed, our sex-  
551 stratified analyses identified associations mapped in genes involved in the estrogen signaling  
552 pathway (i.e., *SPTBN1*, *ABLIM3*, and *ARHGEF28*). With respect to the loci identified by the  
553 female-specific TWAS, *BAIAP2L2* is particularly interesting. In mice, mutations of the homologous  
554 gene *Baiap2l2* were associated with alterations in hair cell transduction and deafness<sup>75</sup> while the  
555 human locus *BAIAP2L2* is associated with suppression of the estrogen-mediated S-phase entry  
556 pathway in cell-cycle<sup>76</sup>. As the HL is associated with reduced estrogens levels, we hypothesize that  
557 the interplay between *BAIAP2L2* transcriptomic regulation and estrogen levels may play a role in  
558 HL in women.

559  
560 We leveraged the genome-wide association statistics generated by our sex-combined and sex-  
561 stratified analyses to explore HL polygenic architecture in the context of other traits and diseases.  
562 Our phenome-wide genetic correlation analysis identified a wide range of health outcomes that  
563 share a significant proportion of their genetic liability with HL. The subsequent genetically-

564 informed causal inference analysis showed that some of these genetic correlations may be due to  
565 cause-effect relationships linking HL to different health domains, including neurological,  
566 cardiovascular, and cancer-related outcomes. In line with the shared involvement of the auditory  
567 system, the strongest HL genetic correlation was with tinnitus (i.e., the conscious perception of an  
568 auditory sensation in the absence of a corresponding external stimulus<sup>77</sup>). This is consistent with the  
569 strong association between tinnitus and HL in the elderly<sup>78</sup>. A previous Mendelian randomization  
570 analysis showed a bidirectional relationship between them<sup>28</sup>. However, our LCV analysis supports  
571 that HL may have a causal effect on tinnitus. Further studies will be needed to understand the  
572 underlying dynamics of these comorbidities.

573

574 In addition, we observed several traits related to the psychological distress generally observed in  
575 elderly individuals. They included positive genetic correlations with disability/infirmity and  
576 tiredness/lethargy and negative genetic correlations with the propensity to social activities and the  
577 belief that life is meaningful. These findings illustrate that HL is associated with multiple aspects of  
578 quality of life in aging populations. We also identified five traits that showed statistically significant  
579 sex differences in their correlation with HL. Four of them were related to educational attainment  
580 where the genetic correlation with HL was positive in females and negative in males. A previous  
581 study demonstrated that the characteristics and the recruitment strategy of the UKB cohort (the  
582 largest sample in our meta-analysis) influenced some of the sex differences observable in this study  
583 population<sup>79</sup>. Accordingly, this sex difference may be specific to the structure of the UKB cohort.  
584 The other sex difference was related to time spent outside that showed a negative genetic  
585 correlation in females but not in males. This could be related to the higher comorbidity of HL with  
586 depression observed in women compared to men<sup>80</sup>.

587

588 Finally, our multivariate GEWIS analysis explored the interplay of genetic variation with sex  
589 differences and two established HL risk factors, noise pollution and tobacco smoking. Although no



590 single interactive locus remained statistically significant after multiple testing correction, we  
591 observed several biological processes that are potentially involved in the inter-individual  
592 susceptibility to the effects of HL environmental risk factors. Loci interacting with sex, noise, and  
593 smoking environmental factors were mostly enriched for the same molecular pathways, suggesting  
594 that HL environmental risk factors may affect the same biological processes that lead to the onset of  
595 the diseases. In particular, we observed an overrepresentation of pathways related to brain  
596 developmental processes. An intriguing finding was the observed higher risk of HL with maternal  
597 smoking around birth, suggesting that early life exposures may influence later life auditory  
598 function.

599  
600 Although our findings advance our understanding of HL and its consequences in adults, we also  
601 acknowledge several limitations. Similar to previous HL GWAS<sup>8,13-16</sup>, our primary analyses were  
602 based on self-reported data. These appear to be more informative than the audiometric measures  
603 derived from SRT test, but they can still be biased by misreporting linked to cognitive processes,  
604 social desirability, and survey conditions. Our study was focused on acquired HL in adults and we  
605 excluded individuals with congenital HL when possible. However, we did not have information  
606 regarding HL age of onset across all cohorts investigated. Accordingly, a small proportion (<1%) of  
607 congenital HL cases may be present in our study populations. No sex-specific TWAS models are  
608 currently available from GTEx. Accordingly, our sex-stratified TWAS was conducted using sex-  
609 stratified genome-wide association statistics and sex-combined transcriptomic reference panels.  
610 This has likely reduced the statistical power of our analysis. Additionally, GTEx does not include  
611 tissues related to peripheral auditory system, limiting our ability to explore the differences in  
612 transcriptomic changes in the peripheral and central auditory system. Although we investigated  
613 cross-ancestry transferability of HL genetic risk, the limited diversity of the cohorts investigated did  
614 not permit us to explore the genetic basis of HL across ancestry groups. Similar to what observed



615 for other complex traits, HL PRS explained a small phenotypic variance when applied across  
616 cohorts (e.g., the PRS derived from UKB-NHS-HPFS meta-analysis and applied to MVP sample).

617

618 In conclusion, we conducted a comprehensive investigation of the polygenic architecture of HL that  
619 i) identified novel risk loci, ii) provided evidence of the shared HL pathogenesis across human  
620 populations, iii) integrated genetic and transcriptomic data to dissect HL biology, iv) leveraged  
621 genome-wide information to explore the mechanisms underlying HL comorbidities, and v)  
622 uncovered possible biological processes that could underlie inter-individual differences in  
623 susceptibility to the effects of HL environmental risk factors. Further studies will be needed to  
624 translate this information into tools useful to improve HL preventive and therapeutic strategies.

625

## 626 **ACKNOWLEDGEMENTS**

627 This research is funded by the National Institute on Deafness and Other Communication Disorders  
628 (R21 DC018098, UO1 DC010811). The authors also acknowledge grants from the National  
629 Institute on Drug Abuse (R33 DA047527), the National Institute on Mental Health (F32  
630 MH122058), the National Cancer Institute (UM1 CA186107, UO1 CA167552, and UO1  
631 CA176726), the One Mind, and the Marie Skłodowska-Curie Actions (Individual Fellowship  
632 101028810). This research was performed using the UK Biobank Resource under the application  
633 58146. This research is also based on data from the Million Veteran Program, Office of Research  
634 and Development, Veterans Health Administration, and was supported by award #MVP010. This  
635 publication does not represent the views of the Department of Veteran Affairs or the United States  
636 Government. We thank all the participants in the UK Biobank, the Nurse's Health Studies, the  
637 Health Professionals Follow-up Study, and the Million Veteran Program.

638

## 639 **COMPETING INTERESTS**

640 Dr Clifford reported receiving personal fees from Decibel Therapeutics outside the submitted work.  
641 Dr. S. Curhan serves as a consultant to Decibel Therapeutics. Dr. G. Curhan serves as a consultant  
642 to Decibel Therapeutics, AstraZeneca, Shire, Allena Pharmaceuticals, RenalGuard, OrfanBiotech,  
643 OM1, and Merck. He receives royalties from UpToDate for being an author and Section Editor.  
644 None of the other authors declare any competing interests.

645

## 646 REFERENCES

- 647 1. Masterson, E. A. Hearing Impairment Among Noise-Exposed Workers — United States, 2003–  
648 2012. *MMWR Morb. Mortal. Wkly. Rep.* **65**, (2016).
- 649 2. GBD 2015 Disease and Injury Incidence and Prevalence Collaborators. Global, regional, and  
650 national incidence, prevalence, and years lived with disability for 310 diseases and injuries,  
651 1990-2015: a systematic analysis for the Global Burden of Disease Study 2015. *Lancet Lond.*  
652 *Engl.* **388**, 1545–1602 (2016).
- 653 3. World Report on Hearing. [https://www.who.int/teams/noncommunicable-diseases/sensory-](https://www.who.int/teams/noncommunicable-diseases/sensory-functions-disability-and-rehabilitation/highlighting-priorities-for-ear-and-hearing-care)  
654 [functions-disability-and-rehabilitation/highlighting-priorities-for-ear-and-hearing-care.](https://www.who.int/teams/noncommunicable-diseases/sensory-functions-disability-and-rehabilitation/highlighting-priorities-for-ear-and-hearing-care)
- 655 4. Deal, J. A. *et al.* Incident Hearing Loss and Comorbidity: A Longitudinal Administrative Claims  
656 Study. *JAMA Otolaryngol. Neck Surg.* **145**, 36–43 (2019).
- 657 5. Shukla, A. *et al.* Hearing Loss, Loneliness, and Social Isolation: A Systematic Review.  
658 *Otolaryngol.--Head Neck Surg. Off. J. Am. Acad. Otolaryngol.-Head Neck Surg.* **162**, 622–633  
659 (2020).
- 660 6. Malcolm, M., Frost, H. & Cowie, J. Loneliness and social isolation causal association with  
661 health-related lifestyle risk in older adults: a systematic review and meta-analysis protocol. *Syst.*  
662 *Rev.* **8**, 48 (2019).
- 663 7. Nicolson, T. Navigating Hereditary Hearing Loss: Pathology of the Inner Ear. *Front. Cell.*  
664 *Neurosci.* **15**, 184 (2021).

- 665 8. Praveen, K. *et al.* Population-scale analysis of common and rare genetic variation associated  
666 with hearing loss in adults. <http://medrxiv.org/lookup/doi/10.1101/2021.09.27.21264091> (2021)  
667 doi:10.1101/2021.09.27.21264091.
- 668 9. Cunningham, L. L. & Tucci, D. L. Hearing Loss in Adults. *N. Engl. J. Med.* **377**, 2465–2473  
669 (2017).
- 670 10. Hayashi, K., Suzuki, Y., Fujimoto, C. & Kanzaki, S. Molecular Mechanisms and Biological  
671 Functions of Autophagy for Genetics of Hearing Impairment. *Genes* **11**, 1331 (2020).
- 672 11. Zhang, L. *et al.* THOC1 deficiency leads to late-onset nonsyndromic hearing loss through  
673 p53-mediated hair cell apoptosis. *PLOS Genet.* **16**, e1008953 (2020).
- 674 12. Zhang, W. *et al.* Cochlear Gene Therapy for Sensorineural Hearing Loss: Current Status and  
675 Major Remaining Hurdles for Translational Success. *Front. Mol. Neurosci.* **11**, 221 (2018).
- 676 13. Hoffmann, T. J. *et al.* A Large Genome-Wide Association Study of Age-Related Hearing  
677 Impairment Using Electronic Health Records. *PLoS Genet.* **12**, e1006371 (2016).
- 678 14. Sudlow, C. *et al.* UK biobank: an open access resource for identifying the causes of a wide  
679 range of complex diseases of middle and old age. *PLoS Med.* **12**, e1001779 (2015).
- 680 15. Kalra, G. *et al.* Biological insights from multi-omic analysis of 31 genomic risk loci for  
681 adult hearing difficulty. *PLOS Genet.* **16**, e1009025 (2020).
- 682 16. Wells, H. R. R. *et al.* GWAS Identifies 44 Independent Associated Genomic Loci for Self-  
683 Reported Adult Hearing Difficulty in UK Biobank. *Am. J. Hum. Genet.* **105**, 788–802 (2019).
- 684 17. Villavisanis, D. F., Berson, E. R., Lauer, A. M., Cosetti, M. K. & Schrode, K. M. Sex-Based  
685 Differences in Hearing Loss: Perspectives from Non-Clinical Research to Clinical Outcomes.  
686 *Otol. Neurotol. Off. Publ. Am. Otol. Soc. Am. Neurotol. Soc. Eur. Acad. Otol. Neurotol.* **41**, 290–  
687 298 (2020).
- 688 18. Nolan, L. S. Age-related hearing loss: Why we need to think about sex as a biological  
689 variable. *J. Neurosci. Res.* **98**, 1705–1720 (2020).

- 690 19. Ma, J., Li, C., Kwan, M.-P., Kou, L. & Chai, Y. Assessing personal noise exposure and its  
691 relationship with mental health in Beijing based on individuals' space-time behavior. *Environ.*  
692 *Int.* **139**, 105737 (2020).
- 693 20. Polimanti, R., Jensen, K. P. & Gelernter, J. Phenome-wide association study for CYP2A6  
694 alleles: rs113288603 is associated with hearing loss symptoms in elderly smokers. *Sci. Rep.* **7**,  
695 1034 (2017).
- 696 21. Agrawal, Y., Platz, E. A. & Niparko, J. K. Prevalence of hearing loss and differences by  
697 demographic characteristics among US adults: data from the National Health and Nutrition  
698 Examination Survey, 1999-2004. *Arch. Intern. Med.* **168**, 1522–1530 (2008).
- 699 22. Lin, B. M. *et al.* Cigarette Smoking, Smoking Cessation, and Risk of Hearing Loss in  
700 Women. *Am. J. Med.* **133**, 1180–1186 (2020).
- 701 23. Colditz, G. A., Manson, J. E. & Hankinson, S. E. The Nurses' Health Study: 20-year  
702 contribution to the understanding of health among women. *J. Womens Health* **6**, 49–62 (1997).
- 703 24. Tworoger, S. S., Sluss, P. & Hankinson, S. E. Association between plasma prolactin  
704 concentrations and risk of breast cancer among predominately premenopausal women. *Cancer*  
705 *Res.* **66**, 2476–2482 (2006).
- 706 25. Rimm, E. B. *et al.* Prospective study of alcohol consumption and risk of coronary disease in  
707 men. *Lancet Lond. Engl.* **338**, 464–468 (1991).
- 708 26. Gaziano, J. M. *et al.* Million Veteran Program: A mega-biobank to study genetic influences  
709 on health and disease. *J. Clin. Epidemiol.* **70**, 214–223 (2016).
- 710 27. Bao, Y. *et al.* Origin, Methods, and Evolution of the Three Nurses' Health Studies. *Am. J.*  
711 *Public Health* **106**, 1573–1581 (2016).
- 712 28. Clifford, R. E., Maihofer, A. X., Stein, M. B., Ryan, A. F. & Nievergelt, C. M. Novel Risk  
713 Loci in Tinnitus and Causal Inference With Neuropsychiatric Disorders Among Adults of  
714 European Ancestry. *JAMA Otolaryngol.-- Head Neck Surg.* **146**, 1015–1025 (2020).

- 715 29. Bycroft, C. *et al.* The UK Biobank resource with deep phenotyping and genomic data.  
716 *Nature* **562**, 203–209 (2018).
- 717 30. Lindström, S. *et al.* A comprehensive survey of genetic variation in 20,691 subjects from  
718 four large cohorts. *PLOS ONE* **12**, e0173997 (2017).
- 719 31. Ware, E. B. *et al.* Genome-wide Association Study of 24-Hour Urinary Excretion of  
720 Calcium, Magnesium, and Uric Acid. *Mayo Clin. Proc. Innov. Qual. Outcomes* **3**, 448–460  
721 (2019).
- 722 32. Hunter-Zinck, H. *et al.* Genotyping Array Design and Data Quality Control in the Million  
723 Veteran Program. *Am. J. Hum. Genet.* **106**, 535–548 (2020).
- 724 33. Manichaikul, A. *et al.* Robust relationship inference in genome-wide association studies.  
725 *Bioinforma. Oxf. Engl.* **26**, 2867–2873 (2010).
- 726 34. Fang, H. *et al.* Harmonizing Genetic Ancestry and Self-identified Race/Ethnicity in  
727 Genome-wide Association Studies. *Am. J. Hum. Genet.* **105**, 763–772 (2019).
- 728 35. Chang, C. C. *et al.* Second-generation PLINK: rising to the challenge of larger and richer  
729 datasets. *GigaScience* **4**, (2015).
- 730 36. Willer, C. J., Li, Y. & Abecasis, G. R. METAL: fast and efficient meta-analysis of  
731 genomewide association scans. *Bioinformatics* **26**, 2190–2191 (2010).
- 732 37. Bulik-Sullivan, B. K. *et al.* LD Score regression distinguishes confounding from  
733 polygenicity in genome-wide association studies. *Nat. Genet.* **47**, 291–295 (2015).
- 734 38. Finucane, H. K. *et al.* Partitioning heritability by functional annotation using genome-wide  
735 association summary statistics. *Nat. Genet.* **47**, 1228–1235 (2015).
- 736 39. Gazal, S., Marquez-Luna, C., Finucane, H. K. & Price, A. L. Reconciling S-LDSC and  
737 LDK functional enrichment estimates. *Nat. Genet.* **51**, 1202–1204 (2019).
- 738 40. Wendt, F. R. *et al.* Characterizing the effect of background selection on the polygenicity of  
739 brain-related traits. *Genomics* **113**, 111–119 (2021).

- 740 41. O'Connor, L. J. & Price, A. L. Distinguishing genetic correlation from causation across 52  
741 diseases and complex traits. *Nat. Genet.* **50**, 1728–1734 (2018).
- 742 42. Watanabe, K., Taskesen, E., van Bochoven, A. & Posthuma, D. Functional mapping and  
743 annotation of genetic associations with FUMA. *Nat. Commun.* **8**, 1826 (2017).
- 744 43. Rentzsch, P., Witten, D., Cooper, G. M., Shendure, J. & Kircher, M. CADD: predicting the  
745 deleteriousness of variants throughout the human genome. *Nucleic Acids Res.* **47**, D886–D894  
746 (2019).
- 747 44. Leeuw, C. A. de, Mooij, J. M., Heskes, T. & Posthuma, D. MAGMA: Generalized Gene-Set  
748 Analysis of GWAS Data. *PLOS Comput. Biol.* **11**, e1004219 (2015).
- 749 45. THE GTEX CONSORTIUM. The GTEx Consortium atlas of genetic regulatory effects  
750 across human tissues. *Science* **369**, 1318–1330 (2020).
- 751 46. Wang, G., Sarkar, A., Carbonetto, P. & Stephens, M. A simple new approach to variable  
752 selection in regression, with application to genetic fine mapping. *J. R. Stat. Soc. Ser. B Stat.*  
753 *Methodol.* **82**, 1273–1300 (2020).
- 754 47. Barbeira, A. N. *et al.* Integrating predicted transcriptome from multiple tissues improves  
755 association detection. *PLoS Genet.* **15**, e1007889 (2019).
- 756 48. Choi, S. W. & O'Reilly, P. F. PRSice-2: Polygenic Risk Score software for biobank-scale  
757 data. *GigaScience* **8**, (2019).
- 758 49. Choi, S. W., Mak, T. S.-H. & O'Reilly, P. F. Tutorial: a guide to performing polygenic risk  
759 score analyses. *Nat. Protoc.* (2020) doi:10.1038/s41596-020-0353-1.
- 760 50. Moore, R. *et al.* A linear mixed model approach to study multivariate gene-environment  
761 interactions. *Nat. Genet.* **51**, 180–186 (2019).
- 762 51. Howe, K. L. *et al.* Ensembl 2021. *Nucleic Acids Res.* **49**, D884–D891 (2021).
- 763 52. Jiao, X. *et al.* DAVID-WS: a stateful web service to facilitate gene/protein list analysis.  
764 *Bioinformatics* **28**, 1805–1806 (2012).

- 765 53. Cherny, S. S. *et al.* Self-reported hearing loss questions provide a good measure for genetic  
766 studies: a polygenic risk score analysis from UK Biobank. *Eur. J. Hum. Genet.* **28**, 1056–1065  
767 (2020).
- 768 54. Nagtegaal, A. P. *et al.* Genome-wide association meta-analysis identifies five novel loci for  
769 age-related hearing impairment. *Sci. Rep.* **9**, 15192 (2019).
- 770 55. Youngblood, H. A. *et al.* Identification of Estrogen Signaling in a Prioritization Study of  
771 Intraocular Pressure-Associated Genes. *Int. J. Mol. Sci.* **22**, 10288 (2021).
- 772 56. Wu, J.-R., Zhao, Y., Zhou, X.-P. & Qin, X. Estrogen receptor 1 and progesterone receptor  
773 are distinct biomarkers and prognostic factors in estrogen receptor-positive breast cancer:  
774 Evidence from a bioinformatic analysis. *Biomed. Pharmacother.* **121**, 109647 (2020).
- 775 57. Wardell, S. E., Nelson, E. R., Chao, C. A. & McDonnell, D. P. Bazedoxifene Exhibits  
776 Antiestrogenic Activity in Animal Models of Tamoxifen-Resistant Breast Cancer: Implications  
777 for Treatment of Advanced Disease. *Clin. Cancer Res.* **19**, 2420–2431 (2013).
- 778 58. Sirugo, G., Williams, S. M. & Tishkoff, S. A. The Missing Diversity in Human Genetic  
779 Studies. *Cell* **177**, 26–31 (2019).
- 780 59. Rosenberg, N. A., Edge, M. D., Pritchard, J. K. & Feldman, M. W. Interpreting polygenic  
781 scores, polygenic adaptation, and human phenotypic differences. *Evol. Med. Public Health* **2019**,  
782 26–34 (2019).
- 783 60. Duncan, L. *et al.* Analysis of polygenic risk score usage and performance in diverse human  
784 populations. *Nat. Commun.* **10**, 3328 (2019).
- 785 61. Vona, B. *et al.* A biallelic variant in CLRN2 causes non-syndromic hearing loss in humans.  
786 *Hum. Genet.* **140**, 915–931 (2021).
- 787 62. Dunbar, L. A. *et al.* Clarin- 2 is essential for hearing by maintaining stereocilia integrity and  
788 function. *EMBO Mol. Med.* **11**, e10288 (2019).
- 789 63. Zhou, B. *et al.* A novel mutation in TRIOBP gene leading to congenital deafness in a  
790 Chinese family. *BMC Med. Genet.* **21**, 121 (2020).



- 791 64. Kochhar, A., Hildebrand, M. S. & Smith, R. J. H. Clinical aspects of hereditary hearing loss.  
792 *Genet. Med.* **9**, 393–408 (2007).
- 793 65. Pollak, A. *et al.* Whole exome sequencing identifies TRIOBP pathogenic variants as a cause  
794 of post-lingual bilateral moderate-to-severe sensorineural hearing loss. *BMC Med. Genet.* **18**, 142  
795 (2017).
- 796 66. Fujimoto, C. & Yamasoba, T. Mitochondria-Targeted Antioxidants for Treatment of  
797 Hearing Loss: A Systematic Review. *Antioxidants* **8**, 109 (2019).
- 798 67. Deng, T. *et al.* Hippocampal Transcriptome-Wide Association Study Reveals Correlations  
799 Between Impaired Glutamatergic Synapse Pathway and Age-Related Hearing Loss in BXD-  
800 Recombinant Inbred Mice. *Front. Neurosci.* **15**, 1356 (2021).
- 801 68. Liberman, M. C. & Kujawa, S. G. Cochlear synaptopathy in acquired sensorineural hearing  
802 loss: Manifestations and mechanisms. *Hear. Res.* **349**, 138–147 (2017).
- 803 69. Xiong, W., Yu, S., Liu, K. & Gong, S. Loss of cochlear ribbon synapses in the early stage of  
804 aging causes initial hearing impairment. *Am. J. Transl. Res.* **12**, 7354–7366 (2020).
- 805 70. Xue, N. *et al.* Genes related to SNPs identified by Genome-wide association studies of age-  
806 related hearing loss show restriction to specific cell types in the adult mouse cochlea. *Hear. Res.*  
807 **410**, 108347 (2021).
- 808 71. Fitzakerley, J. L. & Trachte, G. J. Genetics of guanylyl cyclase pathways in the cochlea and  
809 their influence on hearing. *Physiol. Genomics* **50**, 780–806 (2018).
- 810 72. Qu, H., Tang, H., Pan, J., Zhao, Y. & Wang, W. Alteration of Cortical and Subcortical  
811 Structures in Children With Profound Sensorineural Hearing Loss. *Front. Hum. Neurosci.* **14**,  
812 534 (2020).
- 813 73. Llano, D. A., Kwok, S. S., Devanarayan, V. & The Alzheimer’s Disease Neuroimaging  
814 Initiative (ADNI). Reported Hearing Loss in Alzheimer’s Disease Is Associated With Loss of  
815 Brainstem and Cerebellar Volume. *Front. Hum. Neurosci.* **15**, 562 (2021).



- 816 74. Simonoska, R. *et al.* Inner ear pathology and loss of hearing in estrogen receptor- $\beta$  deficient  
817 mice. *J. Endocrinol.* **201**, 397–406 (2009).
- 818 75. Carlton, A. J. *et al.* Loss of Baiap212 destabilizes the transducing stereocilia of cochlear hair  
819 cells and leads to deafness. *J. Physiol.* **599**, 1173–1198 (2021).
- 820 76. Xu, L. *et al.* BAI1 - associated protein 2 - like 2 is a potential biomarker in lung cancer.  
821 *Oncol. Rep.* **41**, 1304–1312 (2019).
- 822 77. Baguley, D., McFerran, D. & Hall, D. Tinnitus. *Lancet Lond. Engl.* **382**, 1600–1607 (2013).
- 823 78. Biswas, R. *et al.* Tinnitus prevalence in Europe: a multi-country cross-sectional population  
824 study. *Lancet Reg. Health – Eur.* **0**, (2021).
- 825 79. Pirastu, N. *et al.* Genetic analyses identify widespread sex-differential participation bias.  
826 *Nat. Genet.* **53**, 663–671 (2021).
- 827 80. Scinicariello, F. *et al.* Age and sex differences in hearing loss association with depressive  
828 symptoms: analyses of NHANES 2011-2012. *Psychol. Med.* **49**, 962–968 (2019).
- 829
- 830

831 **Figure Legends**

832 **Figure 1:** Genetic correlation among hearing loss traits assessed via questionnaire in UK Biobank.  
833 The square shade intensity is proportional to the magnitude of the correlation.

834 **Figure 2:** Multi-tissue transcriptome-wide association study of hearing loss based on the sex-  
835 combined meta-analysis. The y-axis corresponds to two-tailed  $-\log_{10}$  (p-value of the S-MultiXcan  
836 association). The x-axis reports the genes grouped based on the best single-tissue S-PrediXcan  
837 association. The red line refers to the Bonferroni multiple testing correction accounting for the  
838 number of genes tested ( $p < 2.24 \times 10^{-6}$ ). Bold labels are reported for the top-10 Bonferroni significant  
839 association. Additional labels are included for the top significant result for each tissue. Detailed  
840 results are available in Supplemental Table 12.

841 **Figure 3:** Phenome-wide genetic correlation of hearing loss in the sex-combined analysis. The x-  
842 axis reports the genetic correlation of hearing loss with the traits tested. The y-axis corresponds to  
843 two-tailed  $-\log_{10}$ (p-value). Blue shades correspond to significance strength, from white, non-  
844 significant ( $p > 0.05$ ), to light blue (nominal significance  $p < 0.05$ ), to blue (Bonferroni correction  
845  $p < 9 \times 10^{-6}$ ), and dark blue (top 10 results). Phenotype labels are included for the top 10 results. Full  
846 results are reported in Supplemental Table 15.

847 **Figure 4:** Visual representation of the 22 significant putative causal effects identified through the  
848 latent causal variable analysis. Brown labels: HL has causative effect for the trait in the label;  
849 Purple labels: Trait in the label has causative effect for HL. The absolute gcp (genetic causality  
850 proportion) value for each association is reported within the arrow, and the directions refer to the  
851 cause-effect relationship (Blue: HL causes Trait; Red: Trait causes HL). The shade intensity of the  
852 arrows is proportional to the statistical significance of the gcp estimates. Description of each trait  
853 tested, and details of the associations is available in Supplemental Table 16.

854 **Supplemental Figure 1:** Visual representation of the fine-mapping analysis for sex-combined  
855 meta-analysis. Each panel refers to a GWS risk locus. The variants were identified according to  
856 their LD with respect to the lead SNP and inclusion in the credible set with at most ten causal  
857 variants.

858 **Supplemental Figure 2:** Visual representation of the fine-mapping analysis for female meta-  
859 analysis. Each panel refers to a GWS risk locus. The variants were identified according to their LD  
860 with respect to the lead SNP and inclusion in the credible set with at most ten causal variants.

861 **Supplemental Figure 3:** Visual representation of the fine-mapping analysis for male meta-analysis.  
862 Each panel refers to a GWS risk locus. The variants were identified according to their LD with  
863 respect to the lead SNP and inclusion in the credible set with at most ten causal variants.

864

865

866

867

868



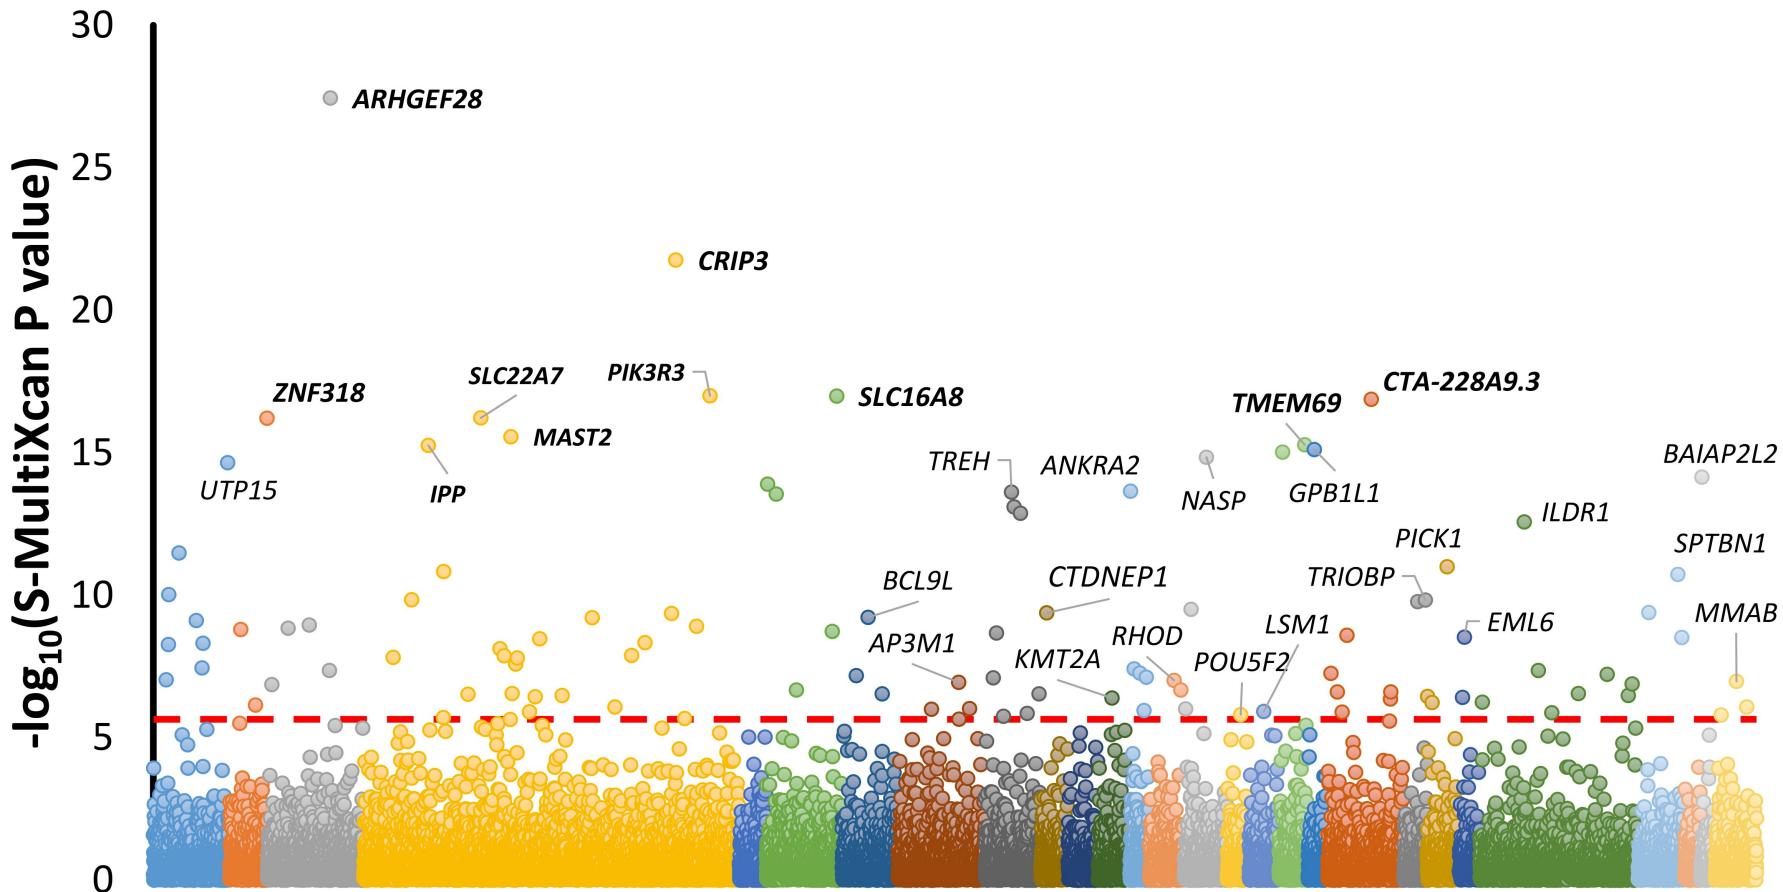

- |                   |                   |                |               |
|-------------------|-------------------|----------------|---------------|
| ● Adipose         | ● Adrenal Gland   | ● Artery       | ● Brain       |
| ● Breast          | ● Cells           | ● Colon        | ● Esophagus   |
| ● Heart           | ● Kidney          | ● Liver        | ● Lung        |
| ● Salivary Gland  | ● Skeletal Muscle | ● Tibial Nerve | ● Ovary       |
| ● Pancreas        | ● Pituitary Gland | ● Prostate     | ● Skin        |
| ● Small Intestine | ● Spleen          | ● Stomach      | ● Testis      |
| ● Thyroid         | ● Uterus          | ● Vagina       | ● Whole Blood |

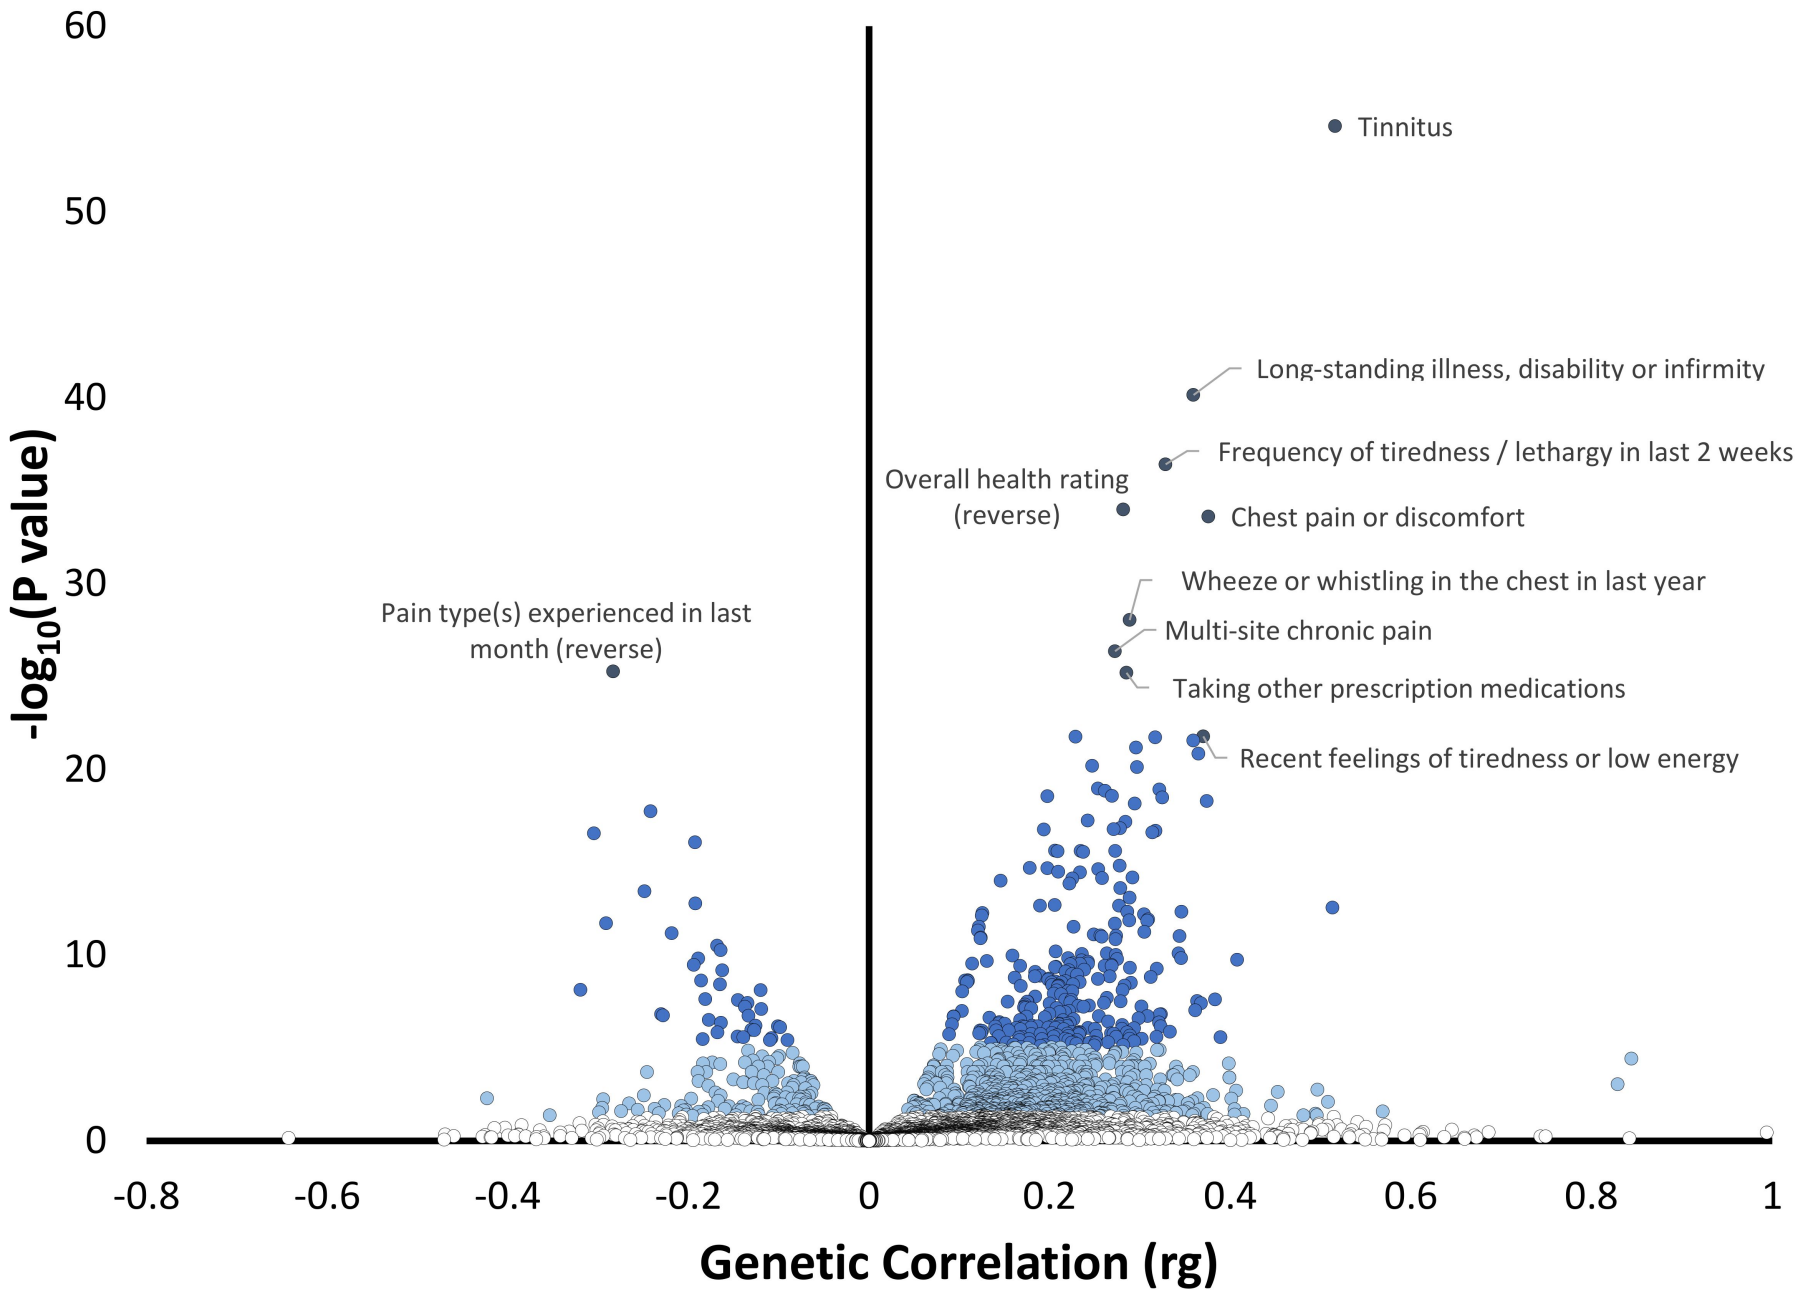

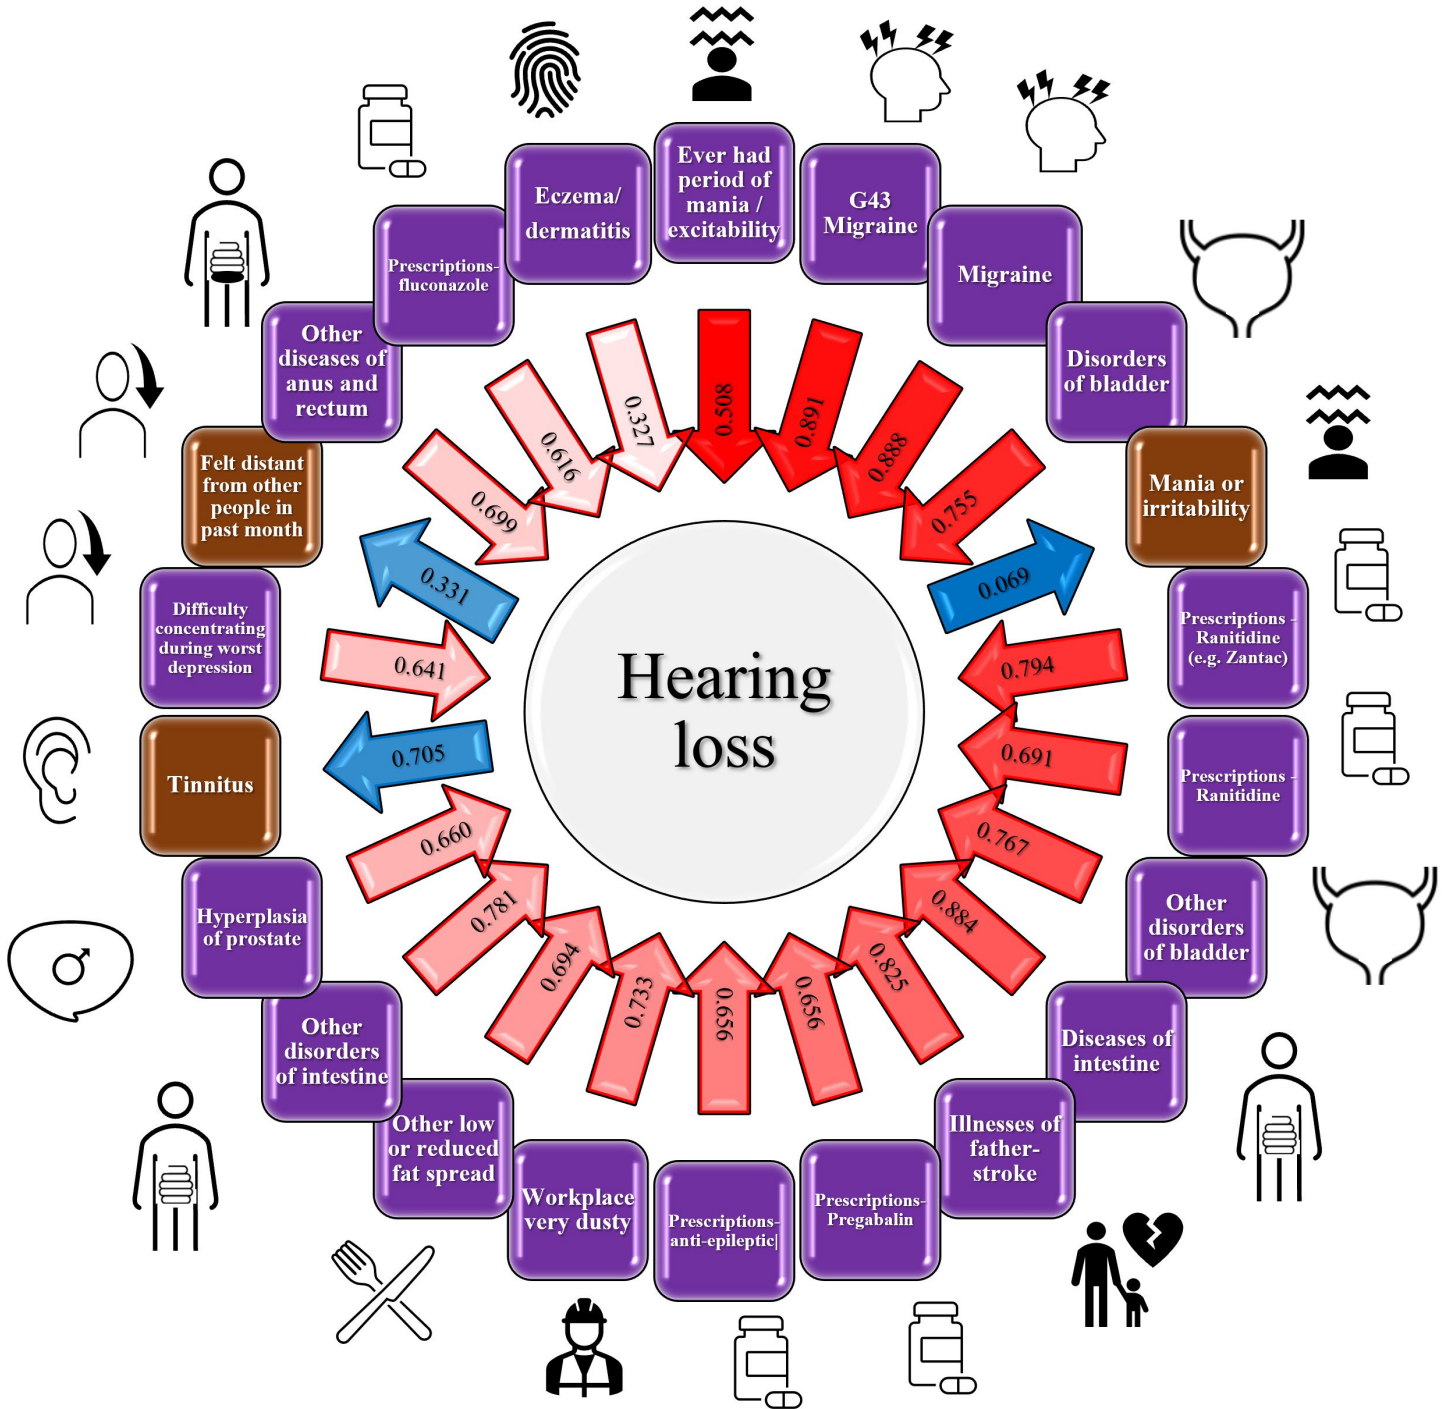

**Table 1: SNP heritability (SNP-h<sup>2</sup>) of hearing loss related traits assessed in the UK**

**Biobank.** SE: standard error.

| <b>Analysis</b> | <b>Trait</b>                                      | <b>N</b>                                           | <b>SNP-h<sup>2</sup></b> | <b>SE</b> | <b>SNP-h<sup>2</sup><br/>Z-score</b> |
|-----------------|---------------------------------------------------|----------------------------------------------------|--------------------------|-----------|--------------------------------------|
| Sex-combined    | Hearing difficulty/problems                       | 465,782<br>(125,011 cases and<br>340,771 controls) | 0.038                    | 0.002     | 20.16                                |
|                 | Hearing difficulty/problems with background noise | 476,031<br>(183,497 cases and<br>292,534 controls) | 0.050                    | 0.002     | 26.11                                |
|                 | Hearing aid user                                  | 321,577<br>(17,754 cases and<br>303,823 controls)  | 0.017                    | 0.002     | 9.67                                 |
|                 | Speech-reception-threshold (SRT) estimate (left)  | 195,188                                            | 0.002                    | 0.002     | 0.96                                 |
|                 | Speech-reception-threshold (SRT) estimate (right) | 195,916                                            | 0.009                    | 0.002     | 3.74                                 |
|                 | Hearing loss ordinal trait                        | 300,818                                            | 0.045                    | 0.003     | 15.23                                |
| Males           | Hearing difficulty/problems                       | 214,549<br>(68,781 cases and<br>145,768 controls)  | 0.048                    | 0.003     | 15.45                                |
|                 | Hearing difficulty/problems with background noise | 218,106<br>(97,002 cases and<br>121,104 controls)  | 0.050                    | 0.003     | 16.23                                |
|                 | Hearing aid user                                  | 156,017<br>(9,882 cases and<br>146,135 controls)   | 0.021                    | 0.003     | 6.59                                 |
|                 | Hearing loss ordinal trait                        | 147,719                                            | 0.051                    | 0.004     | 12.73                                |
| Females         | Hearing difficulty/problems                       | 251,233<br>(56,230 cases and<br>195,003 controls)  | 0.040                    | 0.003     | 14.21                                |
|                 | Hearing difficulty/problems with background noise | 257,925<br>(86,495 cases and<br>171,430 controls)  | 0.054                    | 0.003     | 18.79                                |
|                 | Hearing aid user                                  | 165,560<br>(7,872 cases and<br>157,688 controls)   | 0.017                    | 0.003     | 5.55                                 |
|                 | Hearing loss ordinal trait                        | 153,099                                            | 0.054                    | 0.004     | 13.5                                 |



**Table 2: LD-independent loci associated with hearing difficulties reaching genome-wide significance ( $p < 5 \times 10^{-8}$ ) in the meta-analysis of UK Biobank (UKB), Nurses' Health Studies (NHS; I and II), and Health Professional Follow-up Study (HPFS). The results of the replication analysis in Million Veteran Program (MVP) are also reported. Abbreviations: chromosome (CHR), position (POS); base pairs (bp); Effect Allele Frequency (EAF); Odds Ratio (OR), P value (P).**

| rsID        | CHR | POS (bp)    | Effect Allele | Other Allele | UKB-NHS-HPFS meta-analysis |                        | MVP Replication |                        |
|-------------|-----|-------------|---------------|--------------|----------------------------|------------------------|-----------------|------------------------|
|             |     |             |               |              | OR                         | P                      | OR              | P                      |
| rs36062310  | 22  | 50,988,105  | A             | G            | 1.15                       | $2.75 \times 10^{-32}$ | 1.08            | $4.80 \times 10^{-6}$  |
| rs6871548   | 5   | 73,076,024  | T             | C            | 1.05                       | $2.30 \times 10^{-25}$ | 1.04            | $1.23 \times 10^{-8}$  |
| rs34993346  | 11  | 89,046,097  | A             | G            | 0.95                       | $1.38 \times 10^{-24}$ | 1.00            | 0.872                  |
| rs2254303   | 6   | 43,276,390  | A             | G            | 1.05                       | $1.19 \times 10^{-23}$ | 1.04            | $5.23 \times 10^{-11}$ |
| rs10901863  | 10  | 126,812,270 | T             | C            | 1.05                       | $6.21 \times 10^{-23}$ | 1.06            | $1.17 \times 10^{-11}$ |
| rs739138    | 22  | 38,122,462  | A             | G            | 0.95                       | $4.70 \times 10^{-19}$ | 0.96            | $6.21 \times 10^{-8}$  |
| rs67307131  | 11  | 118,480,223 | T             | C            | 0.96                       | $3.12 \times 10^{-18}$ | 0.97            | $2.83 \times 10^{-7}$  |
| rs9493627   | 6   | 133,789,728 | A             | G            | 1.04                       | $1.03 \times 10^{-17}$ | 1.06            | $1.91 \times 10^{-19}$ |
| rs11073804  | 15  | 89,252,012  | A             | T            | 0.95                       | $5.60 \times 10^{-17}$ | 0.91            | $3.50 \times 10^{-28}$ |
| rs6662164   | 1   | 46,146,230  | A             | T            | 1.04                       | $6.59 \times 10^{-17}$ | 1.04            | $7.44 \times 10^{-9}$  |
| rs72622588  | 3   | 182,003,490 | T             | G            | 0.95                       | $1.53 \times 10^{-16}$ | 0.97            | 0.002                  |
| rs1566128   | 14  | 52,514,981  | A             | G            | 1.04                       | $1.02 \times 10^{-15}$ | 1.04            | $3.98 \times 10^{-11}$ |
| rs6545432   | 2   | 54,817,683  | A             | G            | 1.04                       | $1.05 \times 10^{-15}$ | 1.04            | $2.37 \times 10^{-8}$  |
| rs11041717  | 11  | 8,054,933   | A             | C            | 0.96                       | $7.31 \times 10^{-15}$ | 0.98            | 0.071                  |
| rs2877561   | 3   | 121,712,051 | A             | C            | 1.04                       | $1.62 \times 10^{-14}$ | 1.03            | $4.95 \times 10^{-4}$  |
| rs13147559  | 4   | 17,524,570  | C             | G            | 0.95                       | $3.81 \times 10^{-14}$ | 0.99            | 0.596                  |
| rs2296506   | 6   | 158,507,981 | A             | G            | 1.03                       | $1.70 \times 10^{-13}$ | 1.02            | $3.36 \times 10^{-4}$  |
| rs13171669  | 5   | 148,601,243 | A             | G            | 0.97                       | $1.15 \times 10^{-12}$ | 0.98            | 0.007                  |
| rs12156228  | 8   | 141,701,299 | T             | G            | 0.97                       | $3.67 \times 10^{-12}$ | 0.97            | $6.31 \times 10^{-4}$  |
| rs222836    | 17  | 7,133,162   | A             | G            | 0.97                       | $1.13 \times 10^{-11}$ | 0.98            | $7.37 \times 10^{-4}$  |
| rs4948502   | 10  | 63,839,417  | T             | C            | 1.03                       | $1.26 \times 10^{-11}$ | 1.01            | 0.229                  |
| rs11238325  | 7   | 50,853,151  | T             | C            | 1.04                       | $1.88 \times 10^{-11}$ | 1.04            | $5.65 \times 10^{-6}$  |
| rs35094336  | 8   | 82,670,771  | A             | G            | 1.06                       | $2.07 \times 10^{-11}$ | 1.03            | 0.021                  |
| rs7712395   | 5   | 2,559,538   | T             | C            | 1.05                       | $3.64 \times 10^{-11}$ | 1.04            | $6.45 \times 10^{-5}$  |
| rs143282422 | 10  | 73,377,112  | A             | G            | 1.16                       | $4.43 \times 10^{-11}$ | 1.22            | $8.30 \times 10^{-11}$ |
| rs6675438   | 1   | 165,112,224 | A             | T            | 1.03                       | $8.82 \times 10^{-11}$ | 1.03            | $1.62 \times 10^{-4}$  |
| rs57167368  | 10  | 80,521,351  | A             | G            | 0.96                       | $9.91 \times 10^{-11}$ | 0.97            | 0.001                  |
| rs72930998  | 18  | 52,632,968  | T             | C            | 0.97                       | $2.03 \times 10^{-10}$ | 0.98            | 0.028                  |
| rs1171114   | 6   | 84,227,646  | T             | C            | 0.97                       | $2.69 \times 10^{-10}$ | 0.98            | 0.018                  |
| rs2354376   | 7   | 138,487,145 | A             | C            | 1.03                       | $3.17 \times 10^{-10}$ | 1.01            | 0.100                  |
| rs717973    | 2   | 208,091,112 | A             | G            | 0.97                       | $4.61 \times 10^{-10}$ | 0.99            | 0.072                  |
| rs7819550   | 8   | 74,206,582  | A             | G            | 1.04                       | $6.96 \times 10^{-10}$ | 1.05            | $3.92 \times 10^{-9}$  |
| rs72818515  | 10  | 76,060,718  | A             | C            | 1.03                       | $7.08 \times 10^{-10}$ | 1.01            | 0.186                  |
| rs112725535 | 1   | 6,494,086   | A             | G            | 0.96                       | $7.85 \times 10^{-10}$ | 0.99            | 0.318                  |



|                                          |    |             |       |   |      |                       |      |                       |
|------------------------------------------|----|-------------|-------|---|------|-----------------------|------|-----------------------|
| rs11022697                               | 11 | 13,178,285  | C     | G | 0.97 | $1.17 \times 10^{-9}$ | 0.97 | $1.15 \times 10^{-5}$ |
| rs34073570                               | 5  | 103,998,895 | CT    | C | 0.97 | $1.32 \times 10^{-9}$ | 0.99 | 0.316                 |
| rs61863078                               | 10 | 94,777,108  | A     | G | 1.03 | $1.54 \times 10^{-9}$ | 1.00 | 0.777                 |
| rs111935448                              | 16 | 30,919,807  | T     | C | 1.04 | $1.75 \times 10^{-9}$ | 0.99 | 0.218                 |
| rs58919600                               | 5  | 92,970,519  | T     | C | 1.04 | $1.86 \times 10^{-9}$ | 1.03 | 0.002                 |
| rs11085064                               | 19 | 4,209,152   | A     | G | 1.04 | $2.84 \times 10^{-9}$ | 1.03 | $9.49 \times 10^{-4}$ |
| rs9783279                                | 11 | 68,972,992  | A     | C | 0.97 | $2.97 \times 10^{-9}$ | 1.00 | 0.872                 |
| rs8102051                                | 19 | 2,370,476   | A     | C | 1.03 | $3.38 \times 10^{-9}$ | 1.01 | 0.429                 |
| rs5800853                                | 12 | 109,790,748 | CAG   | C | 1.03 | $4.87 \times 10^{-9}$ | 1.02 | 0.017                 |
| rs1928176                                | 6  | 21,968,899  | A     | G | 0.97 | $5.44 \times 10^{-9}$ | 0.99 | 0.028                 |
| rs9530470                                | 13 | 76,416,638  | A     | G | 0.97 | $5.64 \times 10^{-9}$ | 0.99 | 0.051                 |
| rs148512269                              | 2  | 227,596,034 | T     | G | 1.11 | $9.83 \times 10^{-9}$ | 1.05 | 0.133                 |
| rs61734651                               | 20 | 61,451,332  | T     | C | 1.06 | $1.30 \times 10^{-8}$ | 1.03 | 0.028                 |
| rs8063057                                | 16 | 53,812,433  | T     | C | 1.03 | $1.64 \times 10^{-8}$ | 1.01 | 0.081                 |
| rs566673                                 | 11 | 66,401,373  | T     | G | 0.97 | $1.80 \times 10^{-8}$ | 1.01 | 0.277                 |
| rs78229182                               | 6  | 151128784   | T     | C | 1.05 | $2.07 \times 10^{-8}$ | 0.98 | 0.106                 |
| rs73204028                               | 7  | 115,092,852 | T     | C | 0.97 | $2.20 \times 10^{-8}$ | 0.98 | 0.012                 |
| rs766262445<br>(MVP LD-proxy: rs9536378) | 13 | 53,830,039  | CT(A) | C | 1.03 | $2.63 \times 10^{-8}$ | 1.00 | 0.787                 |
| rs2273654                                | 10 | 102,689,217 | T     | C | 0.97 | $4.01 \times 10^{-8}$ | 0.99 | 0.425                 |
| rs35624969                               | 7  | 72,991,592  | T     | C | 0.97 | $4.66 \times 10^{-8}$ | 0.99 | 0.218                 |
